# Supplementary material for: Difluoromethylation of N-arylsulfonyl hydrazones with difluorocarbene leading to difluoromethyl aryl sulfones
Source: Royal Society of Chemistry journal article supplement (doi:10.1039/c6ra20629h), 2016-01-01

# Supporting Information

## Difluoromethylation of *N*-arylsulfonyl hydrazones with difluorocarbene leading to difluoromethyl aryl sulfones

Qu-Tong Zheng,<sup>sa,b,c</sup> Yun Wei,<sup>sa,b,c</sup> Jian Zheng,<sup>c</sup> Yaya Duan,<sup>c</sup> Gang Zhao,<sup>c</sup> Zong-Bao Wang,<sup>a,b</sup> Jin-Hong Lin,<sup>c\*</sup> Xing Zheng,<sup>a,b\*</sup> Ji-Chang Xiao<sup>a,b,c\*</sup>

<sup>a</sup>*Institute of Pharmacy and Pharmacology, University of South China, 28 Western Changsheng Road, Hengyang, Hunan, 421001, China.; E-mail: zhengxing5018@yahoo.com*

<sup>b</sup>*Hunan Province Cooperative Innovation Center for Molecular Target New Drug Study, 28 Western Changsheng Road, Hengyang, Hunan, 421001, China*

<sup>c</sup>*Key Laboratory of Organofluorine Chemistry, Shanghai Institute of Organic Chemistry, University of Chinese Academy of Sciences, Chinese Academy of Sciences, 345 Lingling Road, Shanghai 200032, China. E-mail: jchxiao@sioac.ac.cn, jlin@sioac.ac.cn ; Fax: +86-21-6416-6128; Tel: +86-21-5492-5340 .*

<sup>s</sup> *These authors contributed equally to this work.*

### Table of Contents

|                                                                                                                            |    |
|----------------------------------------------------------------------------------------------------------------------------|----|
| 1. General Information.....                                                                                                | S2 |
| 2. General procedure for Difluoromethylation .....                                                                         | S2 |
| 3. The determination of the side difluoromethylation product <b>2a'</b> .....                                              | S6 |
| 4. References.....                                                                                                         | S7 |
| 5. Copies of <sup>1</sup> H NMR, <sup>19</sup> F NMR and <sup>13</sup> C NMR Spectra of <b>2a- 2m</b> and <b>2a'</b> ..... | S8 |

## 1. General information

Solvents and reagents were purchased from commercial sources and used as received unless otherwise noted.  $^1\text{H}$ ,  $^{13}\text{C}$  and  $^{19}\text{F}$  NMR spectra were detected on a 500 MHz, 400 MHz or 300 MHz NMR spectrometer. Data for  $^1\text{H}$  NMR,  $^{13}\text{C}$  NMR and  $^{19}\text{F}$  NMR were recorded as follows: chemical shift ( $\delta$ , ppm), multiplicity (s = singlet, d = doublet, t = triplet, m = multiplet, q = quartet, coupling constant (s) in Hz). Mass spectra were obtained on a GC-MS. High resolution mass data were recorded on a high resolution mass spectrometer in the EI or ESI mode.

## 2. General procedure for Difluoromethylation.

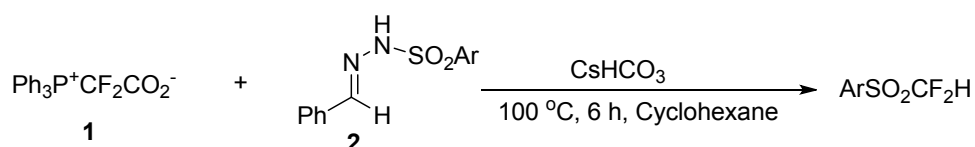

A dried Sealed tube was charged with **2** (0.1 mmol),  $\text{Ph}_3\text{P}^+\text{CF}_2\text{CO}_2^-$  (71.2 mg, 0.3 mmol),  $\text{CsHCO}_3$  (155 mg) and cyclohexane (2 mL) under  $\text{N}_2$ . The resulting mixture was stirred at  $100\text{ }^\circ\text{C}$  for 6h. After being cooled to room temperature, the mixture was subjected to flash column chromatography to afford the pure product.

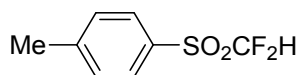

**2a**

### 1-((difluoromethyl)sulfonyl)-4-methylbenzene (**2a**)<sup>[1]</sup>

$^1\text{H}$  NMR (400 MHz,  $\text{CDCl}_3$ )  $\delta$  7.85 (d,  $J = 8.1$  Hz, 2H), 7.42 (d,  $J = 8.0$  Hz, 2H), 6.15 (t,  $J = 53.5$  Hz, 1H), 2.48 (s, 3H).  $^{19}\text{F}$  NMR (376 MHz,  $\text{CDCl}_3$ )  $\delta$  -121.78 (d,  $J = 53.5$  Hz, 2F).

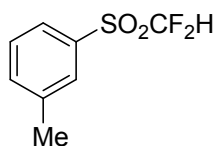

**2b**

### 1-((difluoromethyl)sulfonyl)-3-methylbenzene (**2b**)<sup>[1]</sup>

$^1\text{H}$  NMR (400 MHz,  $\text{CDCl}_3$ )  $\delta$  7.79-7.76 (m, 2H), 7.58 (d,  $J = 7.7$  Hz, 1H), 7.51 (t,  $J = 8.0$  Hz, 1H), 6.16 (t,  $J = 53.4$  Hz, 1H), 2.47 (s, 3H).  $^{19}\text{F}$  NMR (376 MHz,  $\text{CDCl}_3$ )  $\delta$  -121.75 (d,  $J = 53.4$  Hz, 2F).

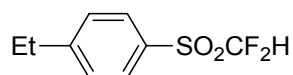

**2c**

**1-((difluoromethyl)sulfonyl)-4-ethylbenzene (2c)**

Colourless liquid.  $^1\text{H}$  NMR (400 MHz,  $\text{CDCl}_3$ )  $\delta$  7.87 (d,  $J = 8.3$  Hz, 2H), 7.45 (d,  $J = 8.5$  Hz, 2H), 6.15 (t,  $J = 53.5$  Hz, 1H), 2.77 (q,  $J = 7.6$  Hz, 2H), 1.28 (t,  $J = 7.6$  Hz, 3H).  $^{19}\text{F}$  NMR (376 MHz,  $\text{CDCl}_3$ )  $\delta$  -121.80 (d,  $J = 53.5$  Hz, 2F).  $^{13}\text{C}$  NMR (101 MHz,  $\text{CDCl}_3$ )  $\delta$  153.37 (s), 130.74 (s), 129.12 (s), 128.75 (s), 114.61 (t,  $J = 285.4$  Hz), 29.07 (s), 14.90 (s). IR (neat)  $\nu = 501, 531, 551, 602, 668, 836, 1080, 1115, 1168, 1189, 1305, 1347, 1412, 1596, 2927, 2971$   $\text{cm}^{-1}$ ; HRMS (EI) Calcd for  $\text{C}_9\text{H}_{10}\text{O}_2\text{F}_2\text{S}$   $[\text{M}]^+$ : 220.2363, Found: 220.0370.

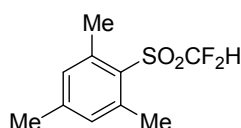

**2d**

**2-((difluoromethyl)sulfonyl)-1,3,5-trimethylbenzene (2d)**

Colourless liquid.  $^1\text{H}$  NMR (400 MHz,  $\text{CDCl}_3$ )  $\delta$  7.02 (s, 2H), 6.14 (t,  $J = 53.7$  Hz, 1H), 2.65 (s, 6H), 2.32 (s, 3H).  $^{19}\text{F}$  NMR (376 MHz,  $\text{CDCl}_3$ )  $\delta$  -122.64 (d,  $J = 53.7$  Hz, 2F).  $^{13}\text{C}$  NMR (101 MHz,  $\text{CDCl}_3$ )  $\delta$  145.81 (s), 143.45 (s), 132.70 (s), 126.28 (s), 115.78 (t,  $J = 285.9$  Hz), 23.19 (s), 21.22 (s). IR (neat)  $\nu = 486, 522, 560, 604, 622, 669, 693, 755, 811, 855, 1036, 1108, 1158, 1170, 1187, 1285, 1307, 1342, 1449, 1602$   $\text{cm}^{-1}$ ; HRMS (EI) Calcd for  $\text{C}_{10}\text{H}_{12}\text{O}_2\text{F}_2\text{S}$   $[\text{M}]^+$ : 234.2629, Found: 234.0526.

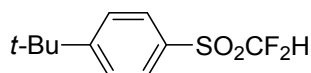

**2e**

**1-((tert-butyl)-4-((difluoromethyl)sulfonyl)benzene (2e)**

Colourless liquid.  $^1\text{H}$  NMR (400 MHz,  $\text{CDCl}_3$ )  $\delta$  7.89 (d,  $J = 8.6$  Hz, 2H), 7.63 (d,  $J = 8.7$  Hz, 2H), 6.16 (t,  $J = 53.5$  Hz, 1 H), 1.35 (s, 9H).  $^{19}\text{F}$  NMR (376 MHz,  $\text{CDCl}_3$ )  $\delta$  -121.80 (d,  $J = 53.4$  Hz, 2F).  $^{13}\text{C}$  NMR (101 MHz,  $\text{CDCl}_3$ )  $\delta$  160.17 (s), 130.51 (s), 128.51 (s), 126.67 (s), 114.63 (t,  $J = 285.5$  Hz), 35.53 (s), 30.95 (s). IR (neat)  $\nu = 501, 540, 561, 588, 610, 646, 693, 753, 842, 1078, 1105, 1171, 1300, 1593, 2966$   $\text{cm}^{-1}$ ; HRMS (EI) Calcd for  $\text{C}_{11}\text{H}_{14}\text{O}_2\text{F}_2\text{S}$   $[\text{M}]^+$ : 248.2895, Found: 248.0683.

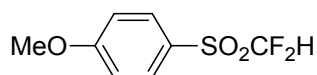

**2f**

**1-((difluoromethyl)sulfonyl)-4-methoxybenzene (2f)<sup>[2]</sup>**

<sup>1</sup>H NMR (400 MHz, CDCl<sub>3</sub>) δ 7.89 (d, *J* = 8.9 Hz, 2H), 7.07 (d, *J* = 8.9 Hz, 2H), 6.14 (t, *J* = 53.7 Hz, 1H), 3.90 (s, 3H). <sup>19</sup>F NMR (376 MHz, CDCl<sub>3</sub>) δ -121.78 (d, *J* = 53.7 Hz, 2F).

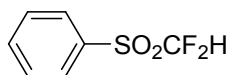

**2g**

**((difluoromethyl)sulfonyl)benzene (2g)<sup>[3]</sup>**

<sup>1</sup>H NMR (400 MHz, CDCl<sub>3</sub>) δ 7.98 (d, *J* = 7.7 Hz, 2H), 7.79 (t, *J* = 7.5 Hz, 1H), 7.64 (t, *J* = 7.8 Hz, 2H), 6.17 (t, *J* = 53.4 Hz, 1H). <sup>19</sup>F NMR (376 MHz, CDCl<sub>3</sub>) δ -121.64 (d, *J* = 53.4 Hz, 2F).

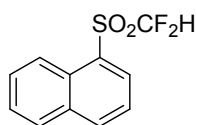

**2h**

**1-((difluoromethyl)sulfonyl)naphthalene (2h)<sup>[4]</sup>**

<sup>1</sup>H NMR (400 MHz, CDCl<sub>3</sub>) δ 8.80 (d, *J* = 8.7 Hz, 1H), 8.39 (d, *J* = 7.4 Hz, 1H), 8.24 (d, *J* = 8.1 Hz, 1H), 7.97 (d, *J* = 8.1 Hz, 1H), 7.72 (t, *J* = 7.8 Hz, 1H), 7.65 (td, *J* = 7.7, 4.0 Hz, 2H), 6.30 (t, *J* = 53.5 Hz, 1H). <sup>19</sup>F NMR (376 MHz, CDCl<sub>3</sub>) δ -121.61 (d, *J* = 53.5 Hz, 2F).

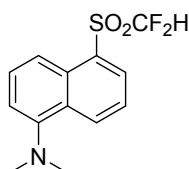

**2i**

**5-((difluoromethyl)sulfonyl)-N,N-dimethylnaphthalen-1-amine (2i)**

Yellow solid. M.P. 102-103 °C. <sup>1</sup>H NMR (400 MHz, CDCl<sub>3</sub>) δ 8.72 (d, *J* = 8.5 Hz, 1H), 8.43 (d, *J* = 8.7 Hz, 1H), 8.37 (d, *J* = 7.4 Hz, 1H), 7.65-7.59 (m, 2H), 7.22 (t, *J* = 7.7 Hz, 1H), 6.31 (t, *J* = 53.6 Hz, 1H), 2.88 (s, 6H). <sup>19</sup>F NMR (376 MHz, CDCl<sub>3</sub>) δ -121.71 (d, *J* = 53.7 Hz, 2F). <sup>13</sup>C NMR (101 MHz, CDCl<sub>3</sub>) δ 152.03 (s), 134.26 (s), 133.74 (s), 131.69 (s), 129.91 (s), 129.34 (s), 127.89 (s), 123.43 (s), 118.74 (s), 115.76 (s), 115.15 (t, *J* = 286.8 Hz), 45.39 (s). IR (neat) ν = 446, 522, 554, 640, 791, 1058, 1111, 1149, 1168, 1200, 1303, 1343, 1570 cm<sup>-1</sup>; HRMS (EI) Calcd for C<sub>13</sub>H<sub>13</sub>O<sub>2</sub>F<sub>2</sub>S [M]<sup>+</sup>: 285.3096, Found: 285.0635.

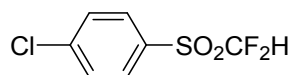

**2j**

**1-chloro-4-((difluoromethyl)sulfonyl)benzene (2j)**<sup>[1]</sup>

<sup>1</sup>H NMR (400 MHz, CDCl<sub>3</sub>) δ 7.91 (d, *J* = 8.6 Hz, 2H), 7.62 (d, *J* = 8.6 Hz, 2H), 6.18 (t, *J* = 53.4 Hz, 1H). <sup>19</sup>F NMR (376 MHz, CDCl<sub>3</sub>) δ -121.30 (d, *J* = 53.3 Hz, 2F).

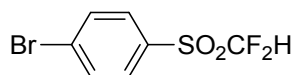

**2k**

**1-bromo-4-((difluoromethyl)sulfonyl)benzene (2k)**<sup>[5]</sup>

<sup>1</sup>H NMR (400 MHz, CDCl<sub>3</sub>) δ 7.83 (d, *J* = 8.7 Hz, 2H), 7.78 (d, *J* = 8.6 Hz, 2H), 6.17 (t, *J* = 53.3 Hz, 1H). <sup>19</sup>F NMR (376 MHz, CDCl<sub>3</sub>) δ -121.29 (d, *J* = 53.4 Hz, 2F).

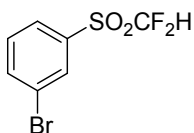

**2l**

**1-bromo-3-((difluoromethyl)sulfonyl)benzene (2l)**<sup>[5]</sup>

<sup>1</sup>H NMR (400 MHz, CDCl<sub>3</sub>) δ 8.11 (s, 1H), 7.93-7.89 (m, 2H), 7.52 (t, *J* = 8.0 Hz, 1H), 6.19 (t, *J* = 53.3 Hz, 1H). <sup>19</sup>F NMR (376 MHz, CDCl<sub>3</sub>) δ -121.16 (d, *J* = 53.2 Hz, 2F).

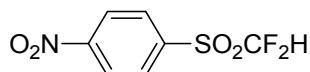

**2m**

**1-((difluoromethyl)sulfonyl)-4-nitrobenzene (2m)**<sup>[6]</sup>

<sup>1</sup>H NMR (400 MHz, CDCl<sub>3</sub>) δ 8.47 (d, *J* = 8.3 Hz, 2H), 8.20 (d, *J* = 8.3 Hz, 2H), 6.25 (t, *J* = 53.1 Hz, 1H). <sup>19</sup>F NMR (376 MHz, CDCl<sub>3</sub>) δ -120.61 (d, *J* = 53.1 Hz, 2F).

### 3. The determination of the side difluoromethylation product

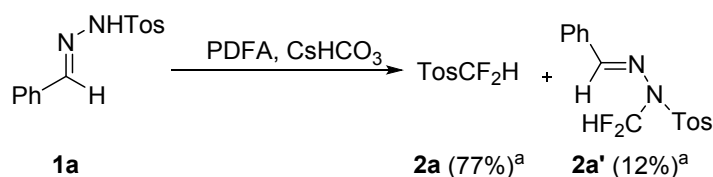

A side difluoromethylation product was always detected by <sup>19</sup>F NMR spectrometry (about -102 ppm) in the reaction mixtures. The byproduct for the conversion of substrate **1a** was isolated and its structure was determined (**2a'**).

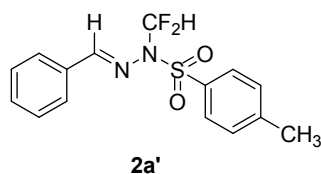

#### (E)-N'-benzylidene-N-(difluoromethyl)-4-methylbenzenesulfonohydrazide (**2a'**)

Yellow solid. <sup>1</sup>H NMR (400 MHz, CDCl<sub>3</sub>) δ 8.55 (s, 1H), 7.75 (d, *J* = 8.3 Hz, 2H), 7.69 (d, *J* = 7.0 Hz, 2H), 7.47 – 7.37 (m, 3H), 7.32 (d, *J* = 8.1 Hz, 2H), 7.18 (t, *J* = 58.8 Hz, 1H), 2.42 (s, 3H). <sup>19</sup>F NMR (376 MHz, CDCl<sub>3</sub>) δ -101.27 (d, *J* = 58.7 Hz, 2F). <sup>13</sup>C NMR (101 MHz, CDCl<sub>3</sub>) δ 161.90 (d, *J* = 1.9 Hz), 145.38 (s), 133.68 (s), 132.91 (s), 131.91 (s), 129.77 (s), 128.78 (s), 128.58 (s), 128.50 (s), 111.67 (t, *J* = 253.1 Hz), 21.69 (s). IR (neat) ν = 535, 565, 602, 671, 692, 757, 813, 837, 864, 887, 1004, 1047, 1111, 1175, 1189, 1224, 1364, 1450, 1574, 1598, 1609 cm<sup>-1</sup>; HRMS (ESI) Calcd for C<sub>15</sub>H<sub>15</sub>O<sub>2</sub>N<sub>2</sub>F<sub>2</sub>S [M+H]<sup>+</sup>: 325.0822, Found: 325.0817.

## 4. References

- [1] C.-A. De, P. -R. Van, R. Pollet, *Bull. Soc. Chim. Belg.* 1965, **74**, 270-280.
- [2] Boiko, Yagupol'skii, *J. Org. Chem. USSR* 1971, **7**, 784- 788.
- [3] M.-K. Justyna, K. Joanna, K. Henryk, *J. Fluorine. Chem.* 2015, **179**, 175–178.
- [4] J. Hine, J.-J. Porter, *J. Am. Chem. Soc.* 1960, **82**, 6178-6181.
- [5] E.-S. Endel'man., V.-S. Danilenko, F.-P. Trinus, P.-A. Yufa, A.-G. Fadeicheva, I.-I. Muravov, Y.-A. Fialkov, L.-M. Yagupol'skii, *Pharm. Chem. J.* 1973, **7**, 755-759.
- [6] G.-K. Prakash, C.-F.Ni, F. Wang, J.-B. Hu, G.-A. Olah, *Angew. Chem. Int. Edit.* 2011, **50**, 2559-2563.

## 5. Copies of $^1\text{H}$ NMR, $^{19}\text{F}$ NMR and $^{13}\text{C}$ NMR Spectra of 2a-2m and 2a'.

$^{19}\text{F}$  NMR

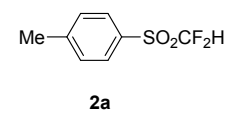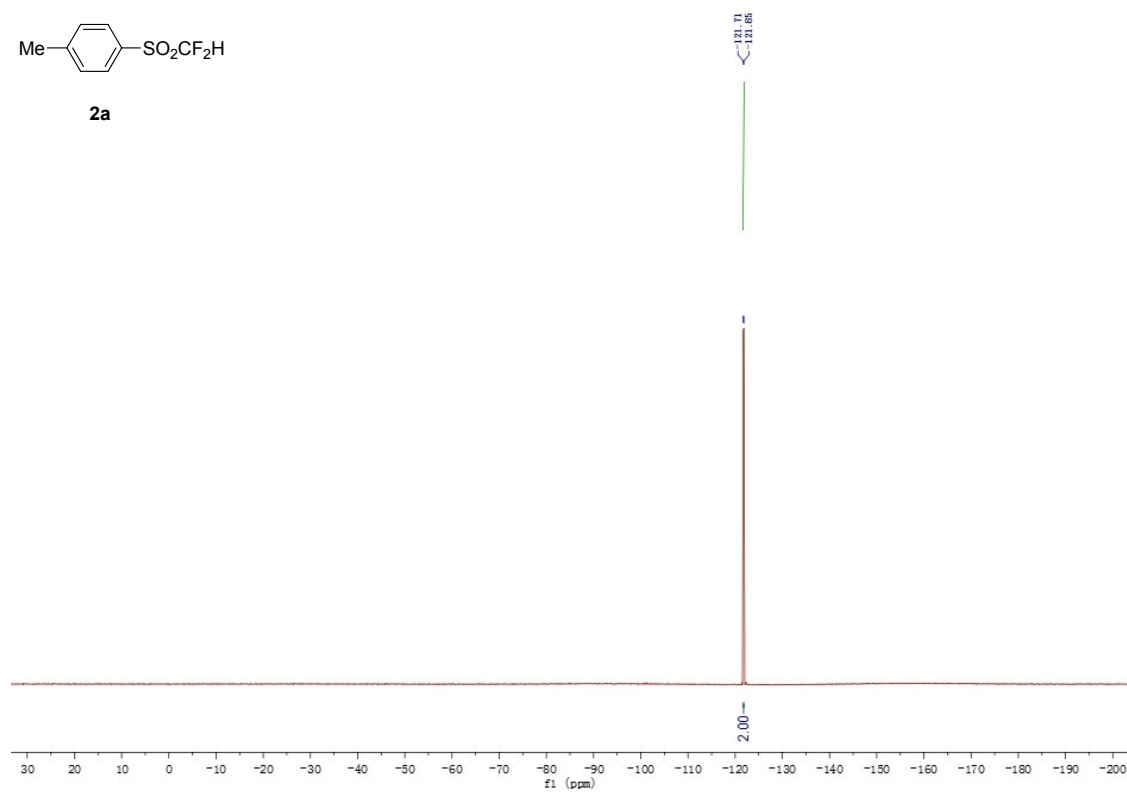

$^1\text{H}$  NMR

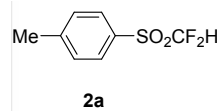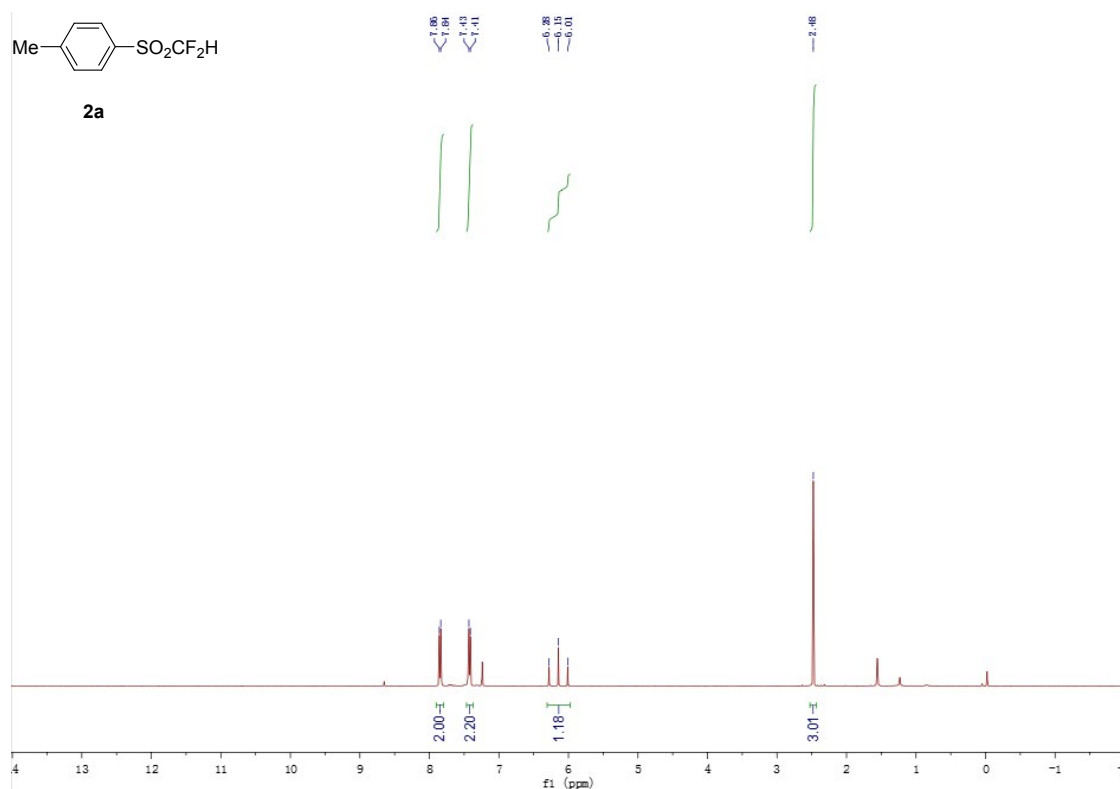



<sup>19</sup>F NMR

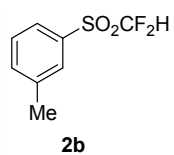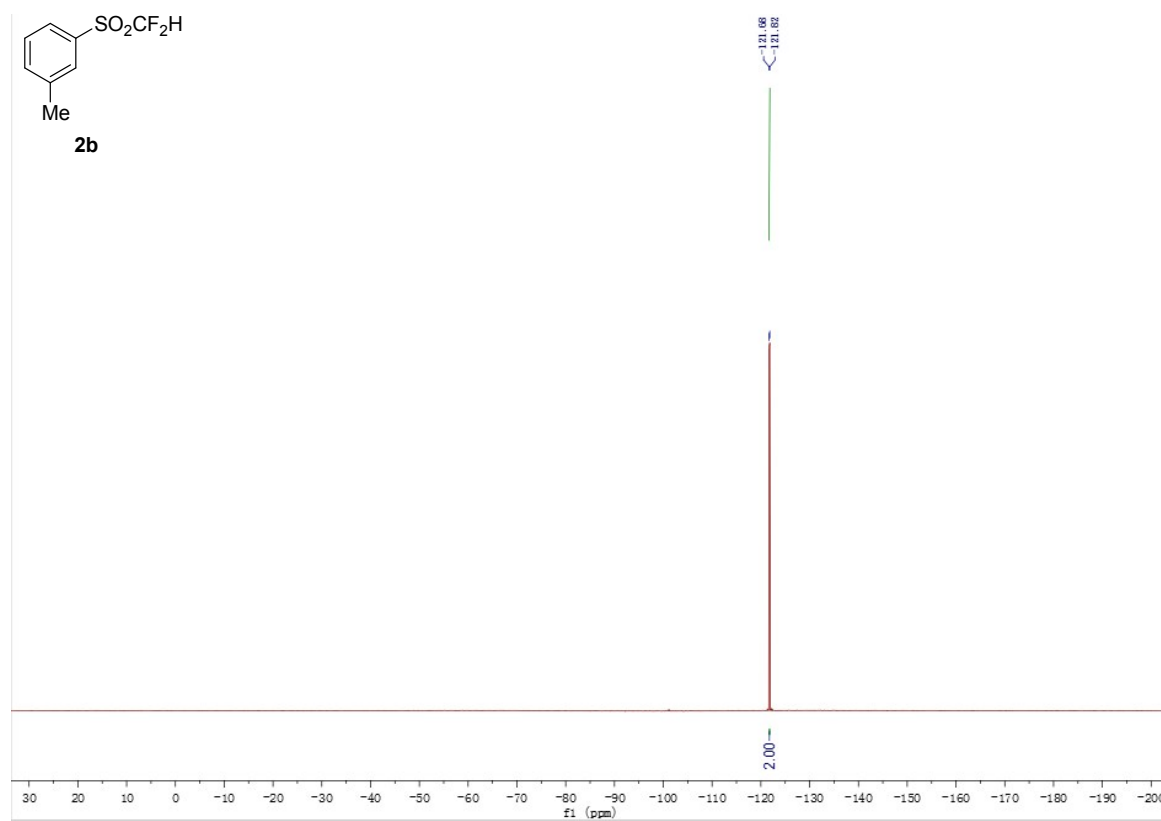

<sup>1</sup>H NMR

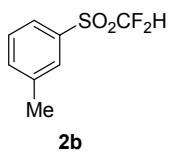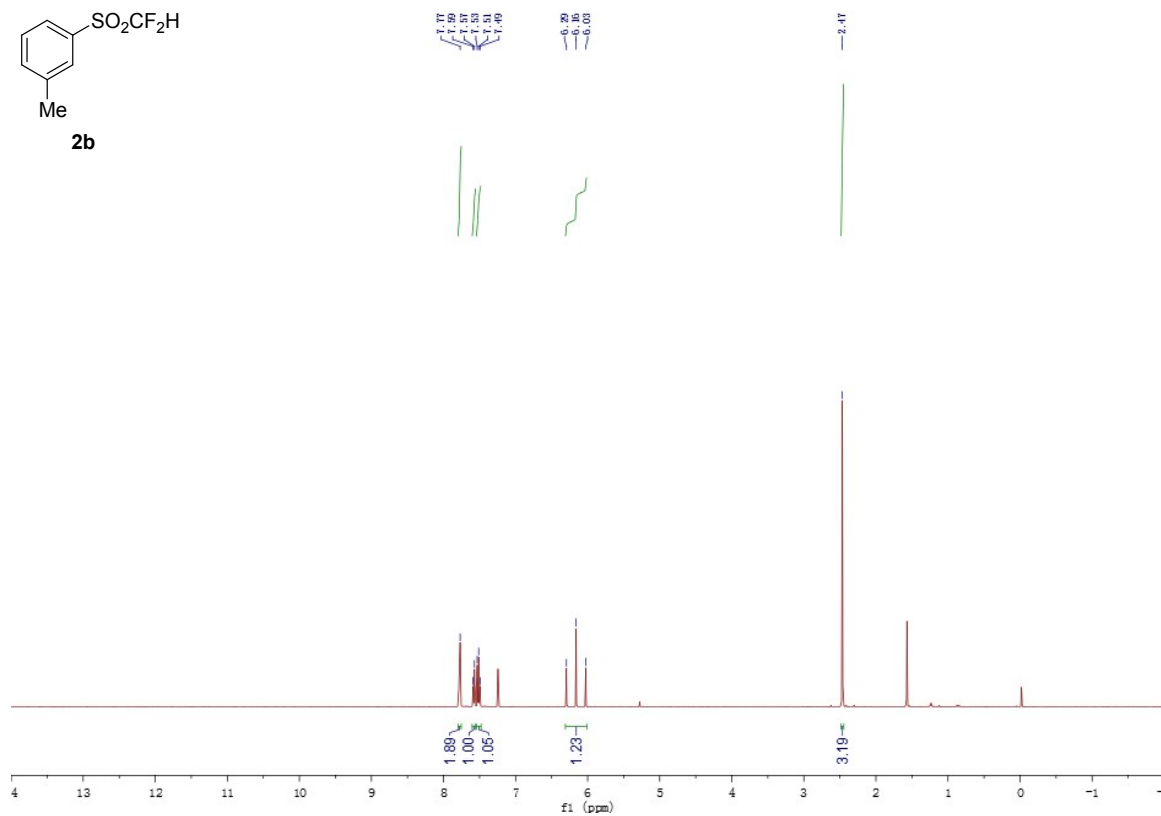

<sup>19</sup>F NMR

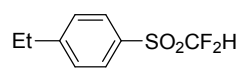

**2c**

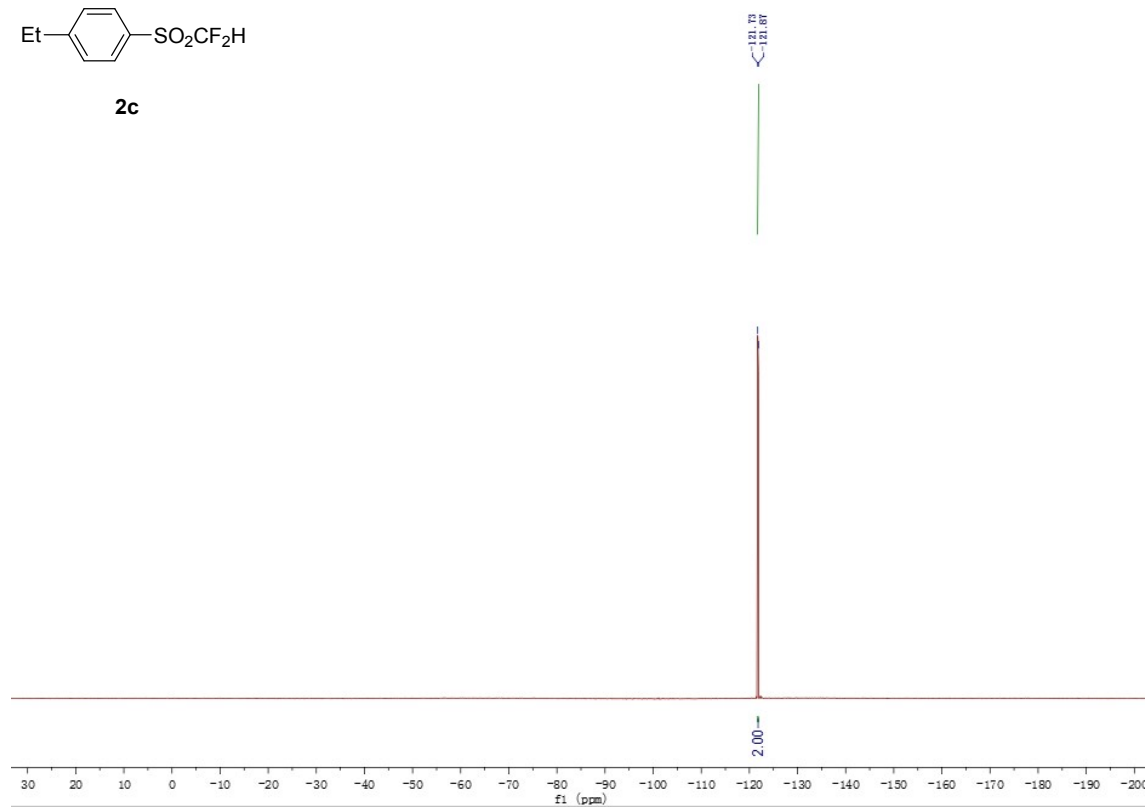

<sup>1</sup>H NMR

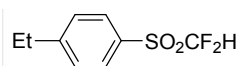

**2c**

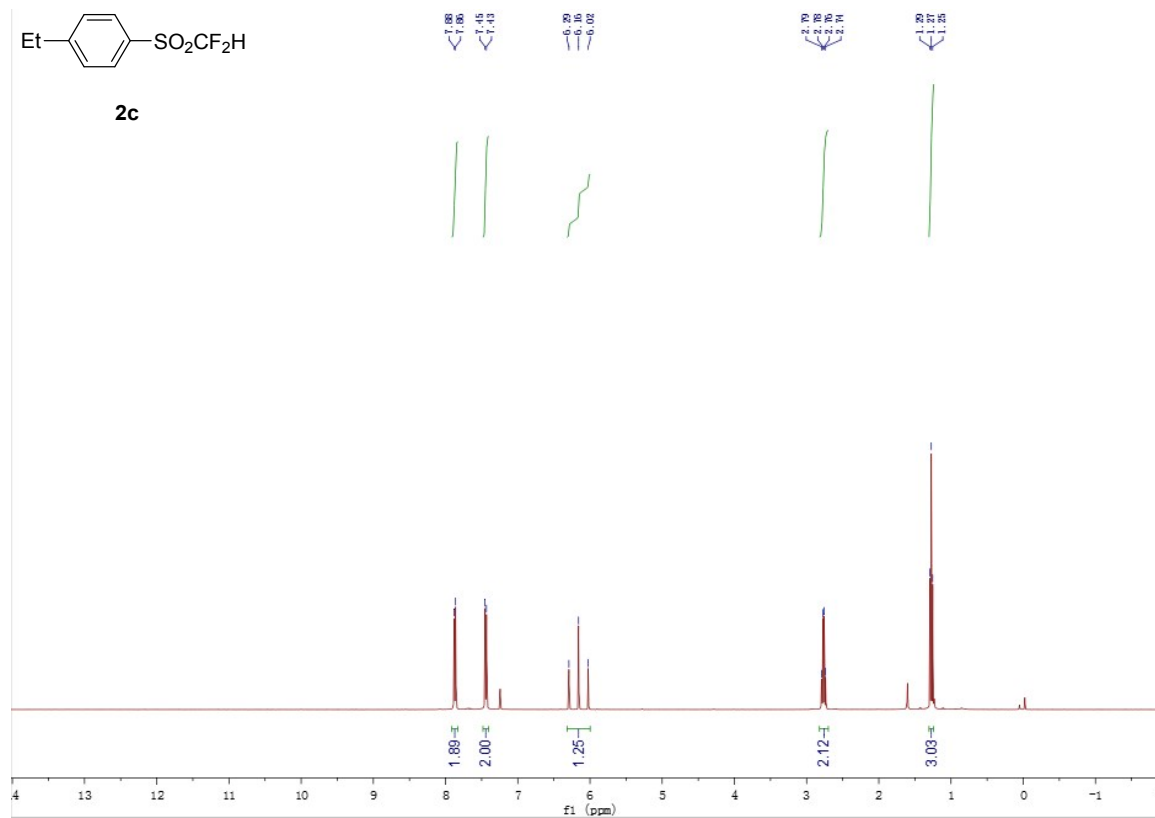

<sup>13</sup>C NMR

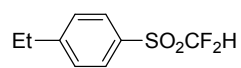

**2c**

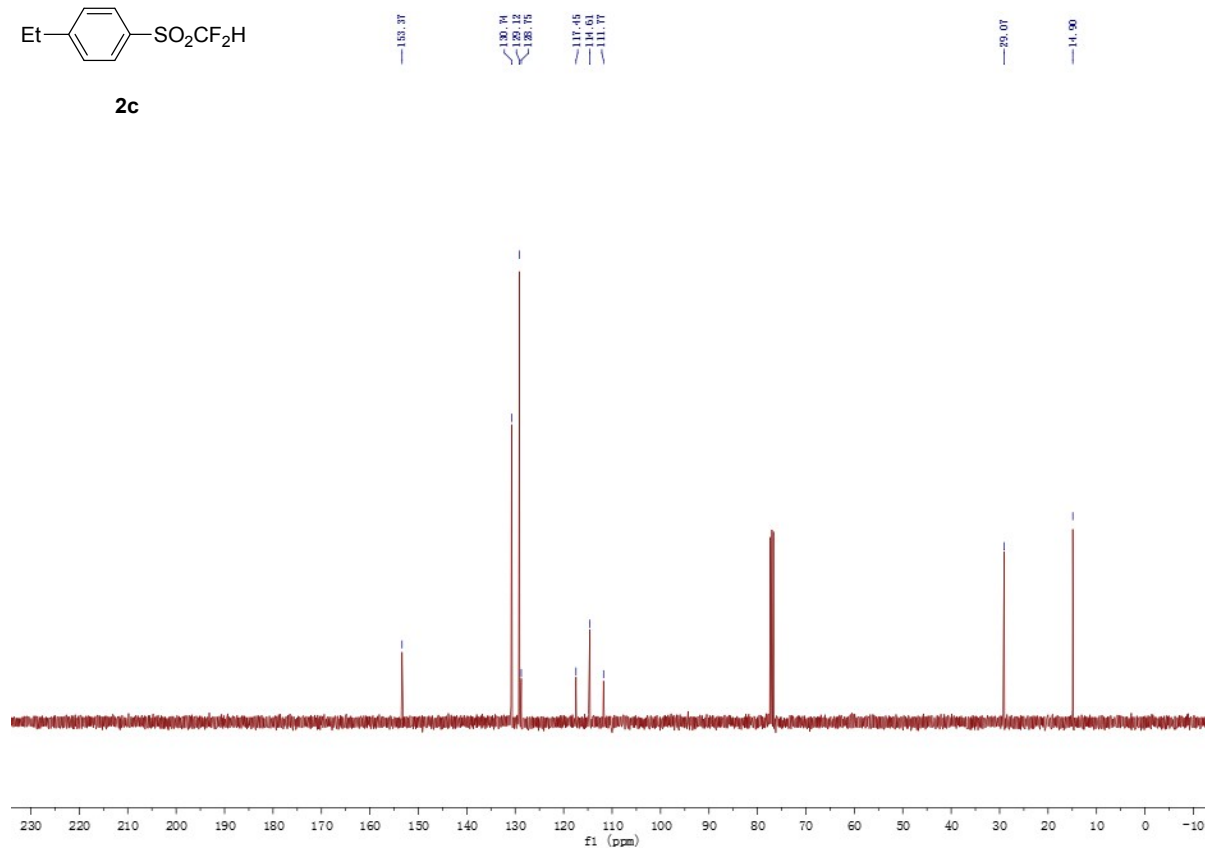

<sup>19</sup>F NMR

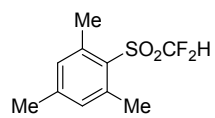

**2d**

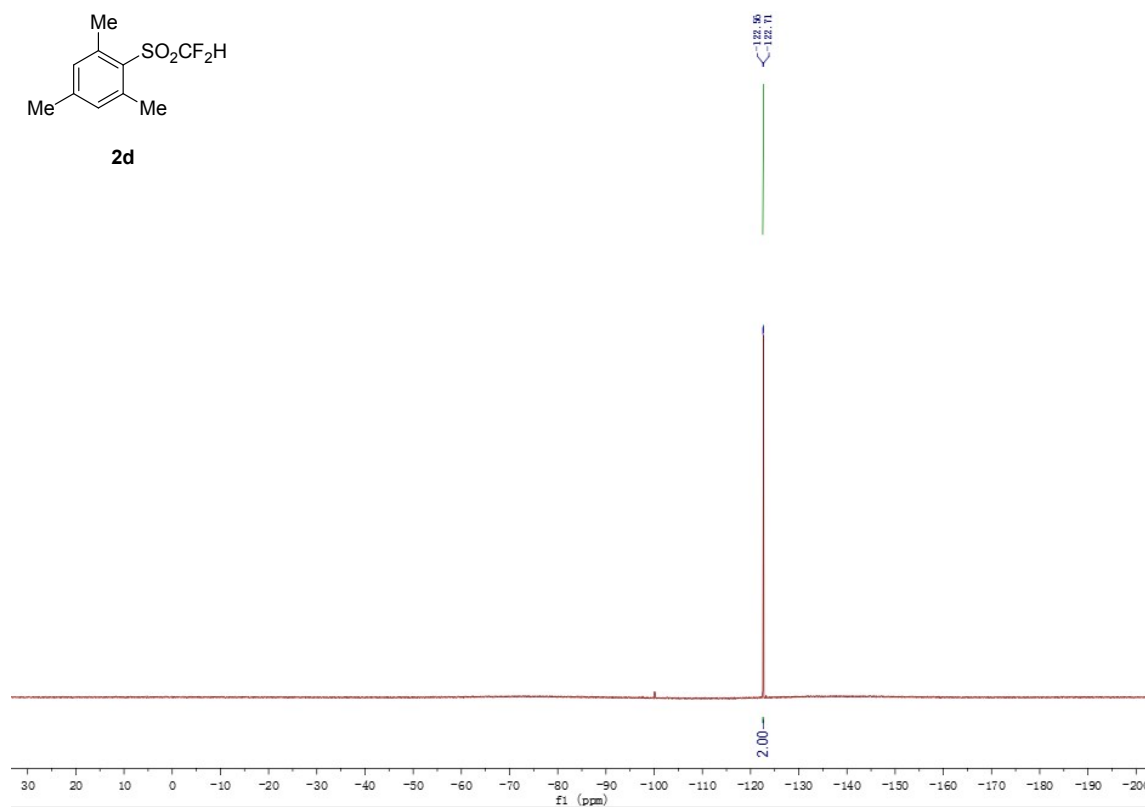

<sup>1</sup>H NMR

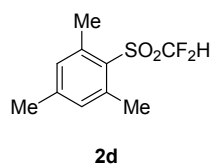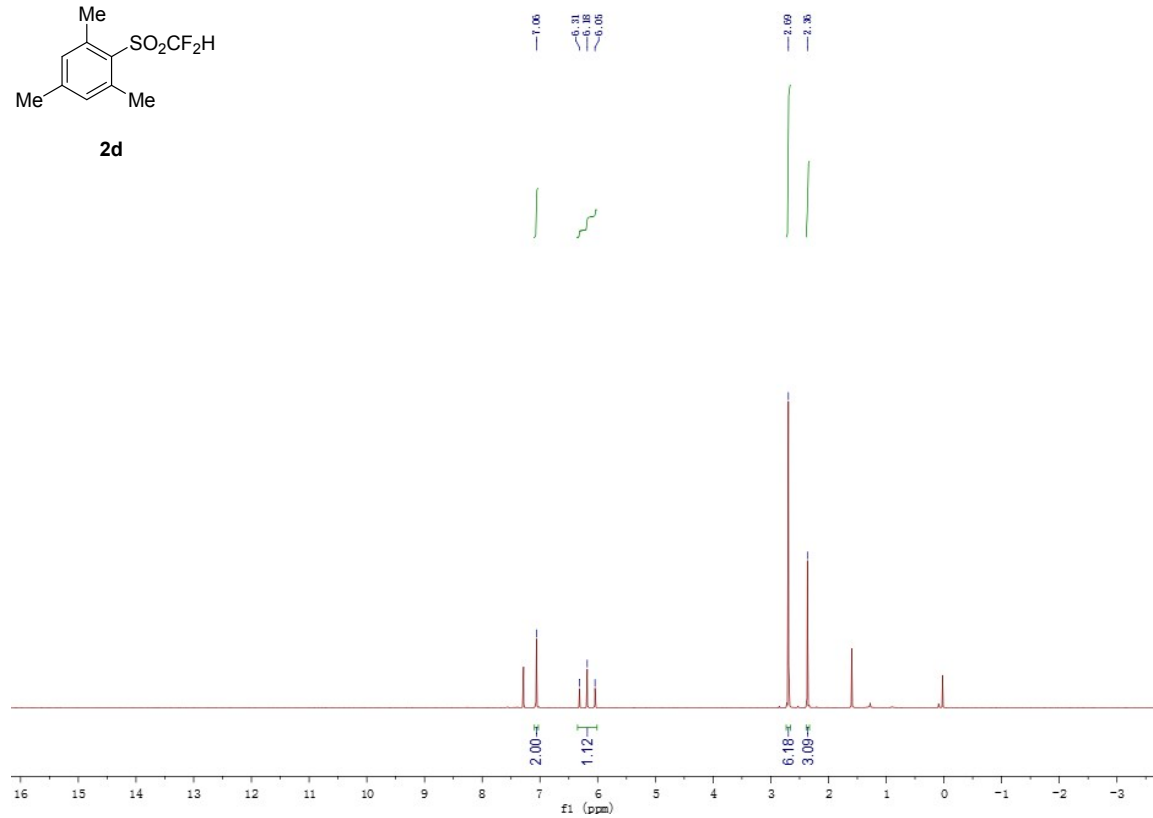

<sup>13</sup>C NMR

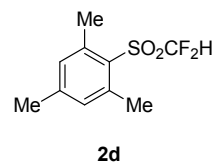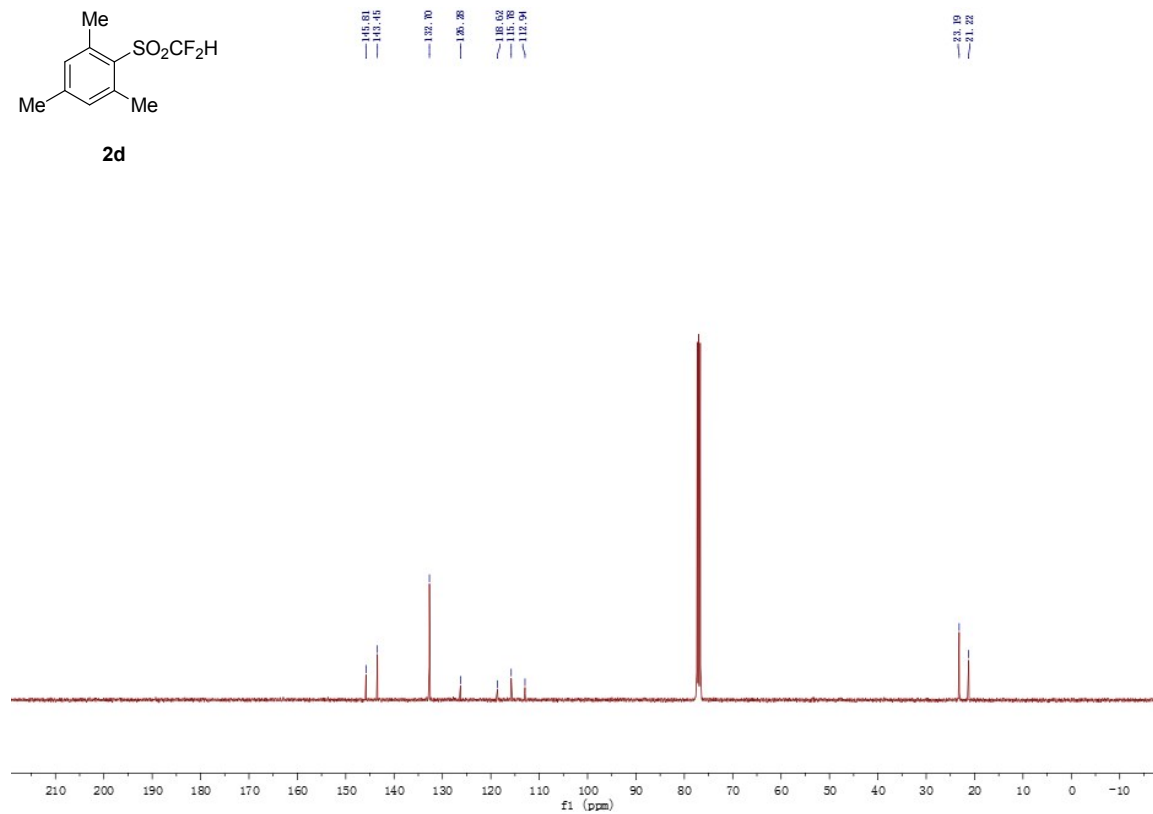

<sup>19</sup>F NMR

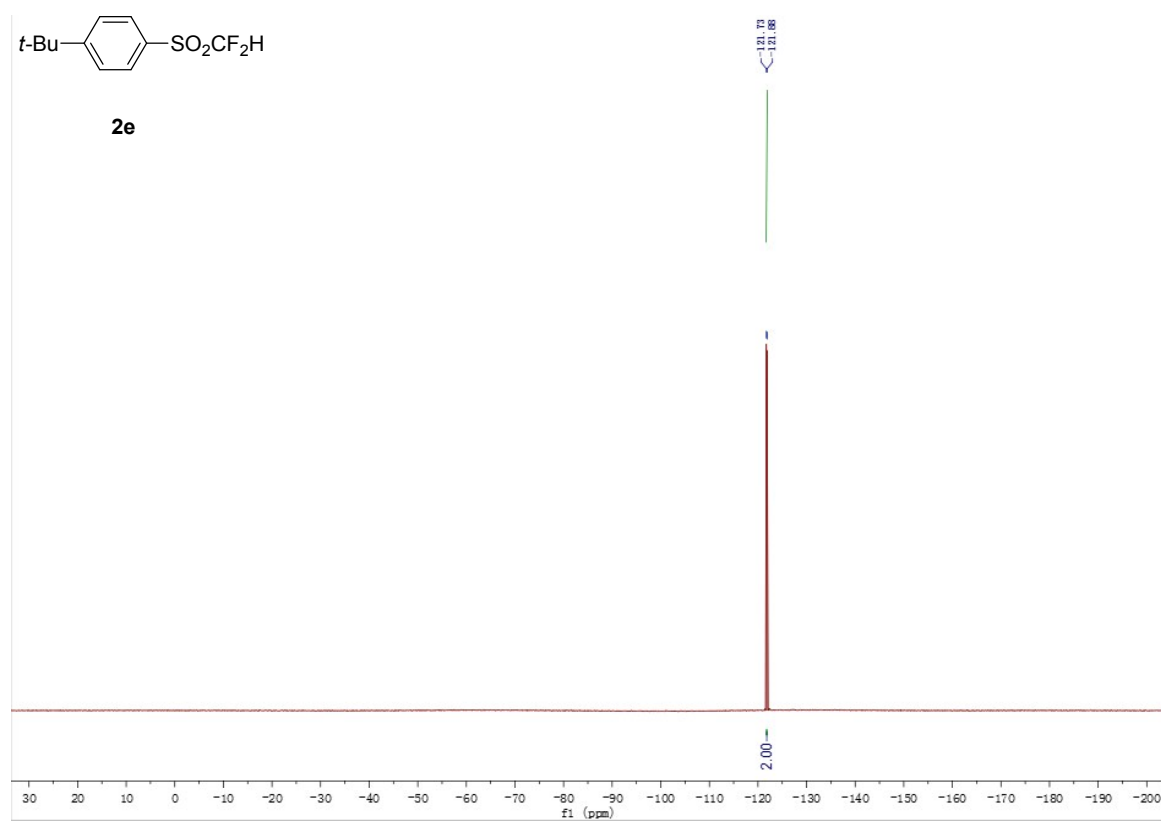

<sup>1</sup>H NMR

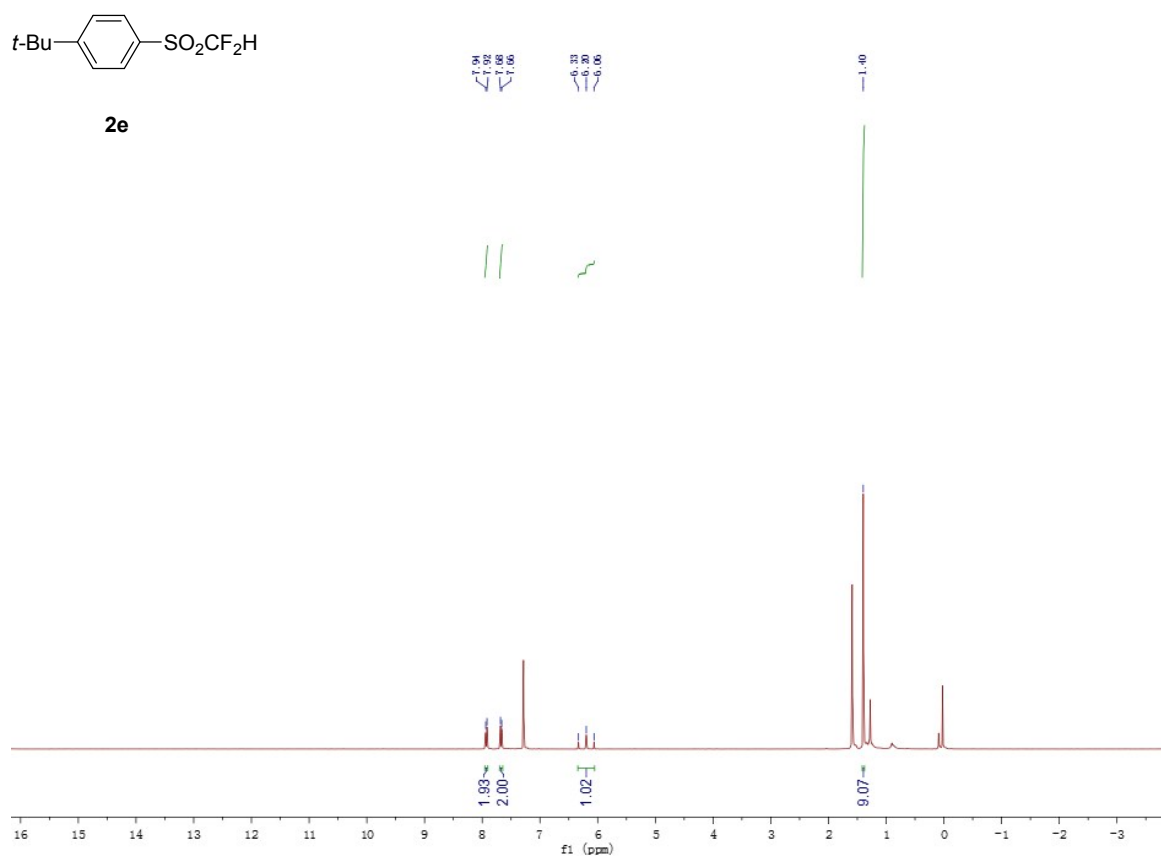

<sup>13</sup>C NMR

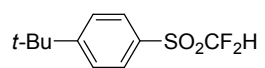

**2e**

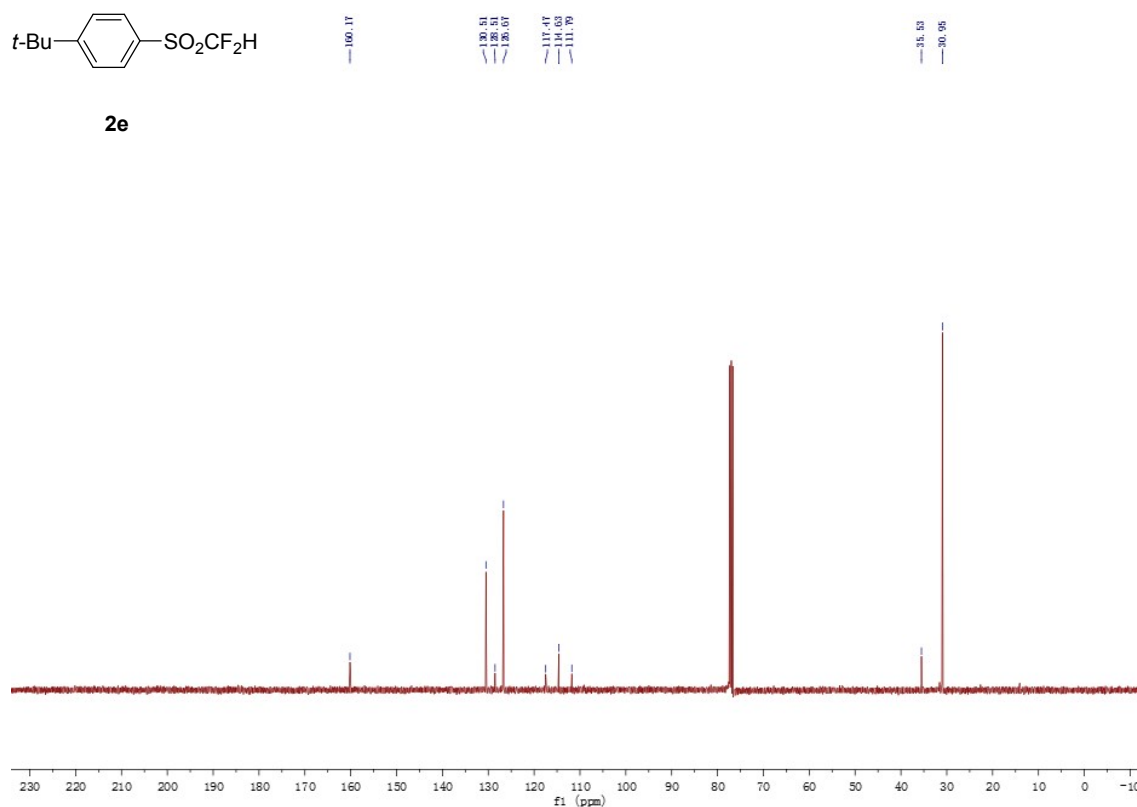

<sup>19</sup>F NMR

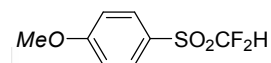

**2f**

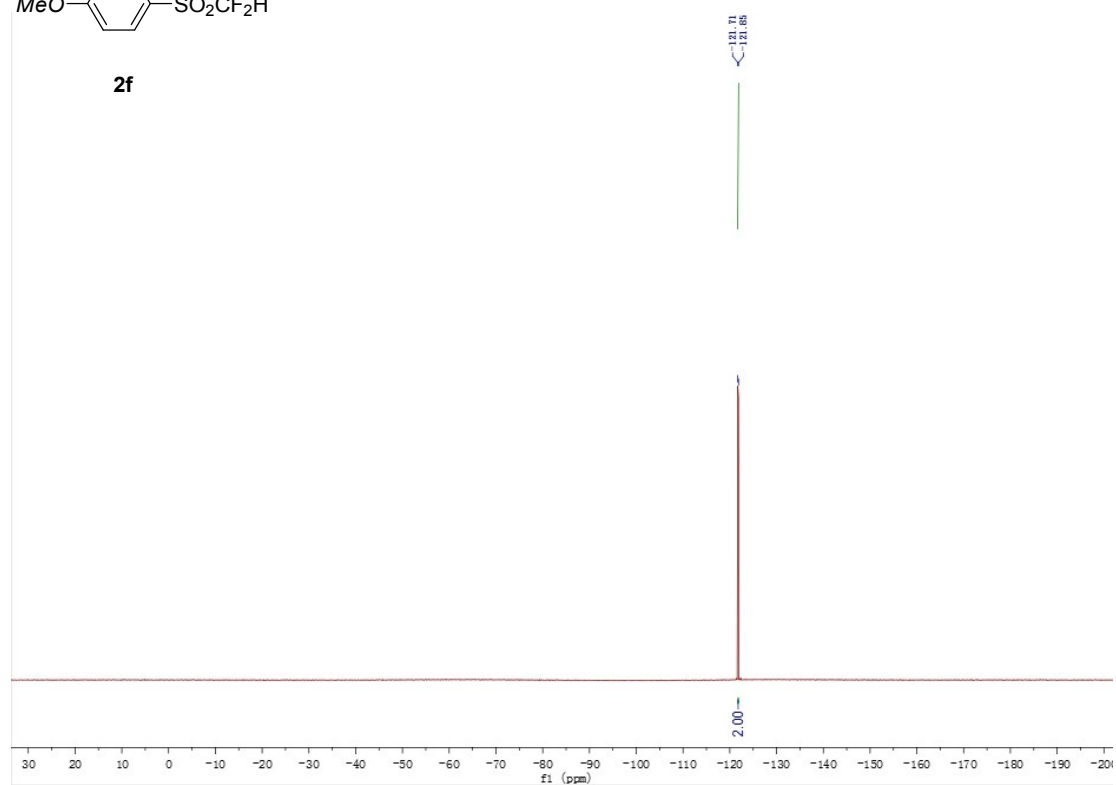

<sup>1</sup>H NMR

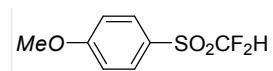

**2f**

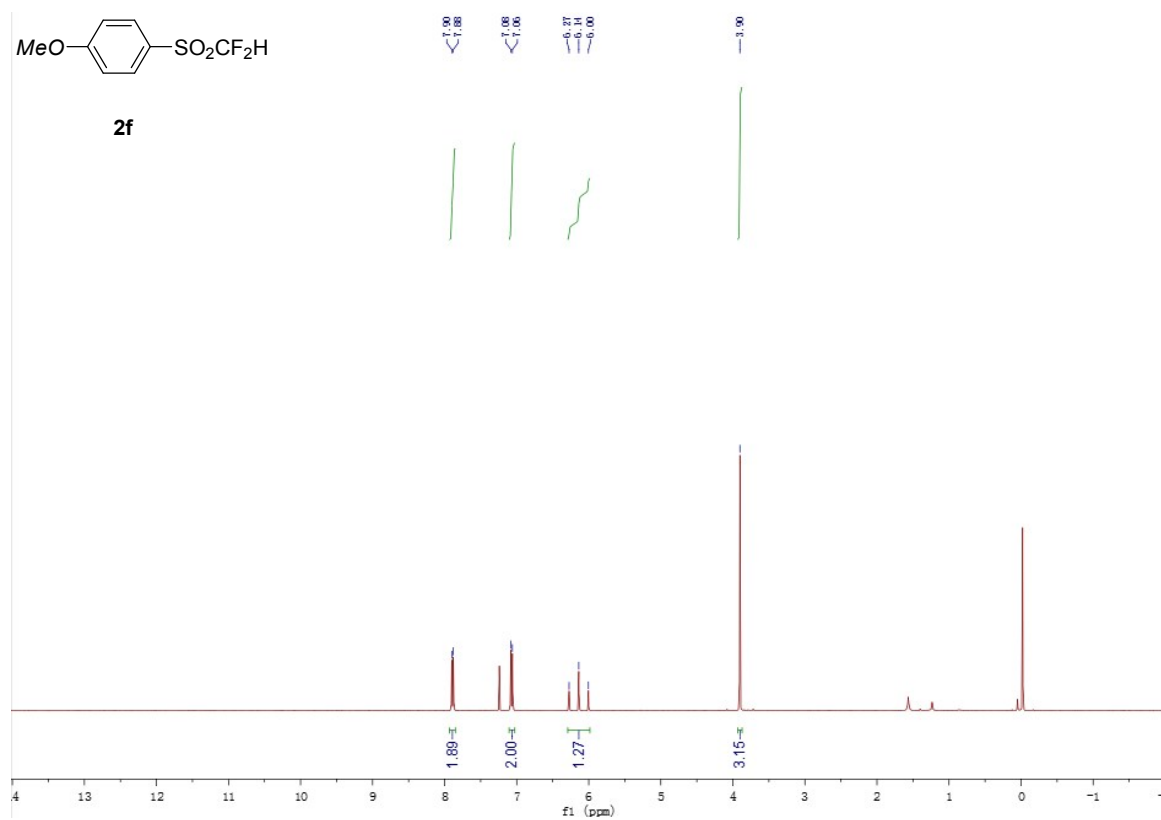

<sup>19</sup>F NMR

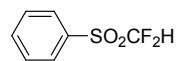

**2g**

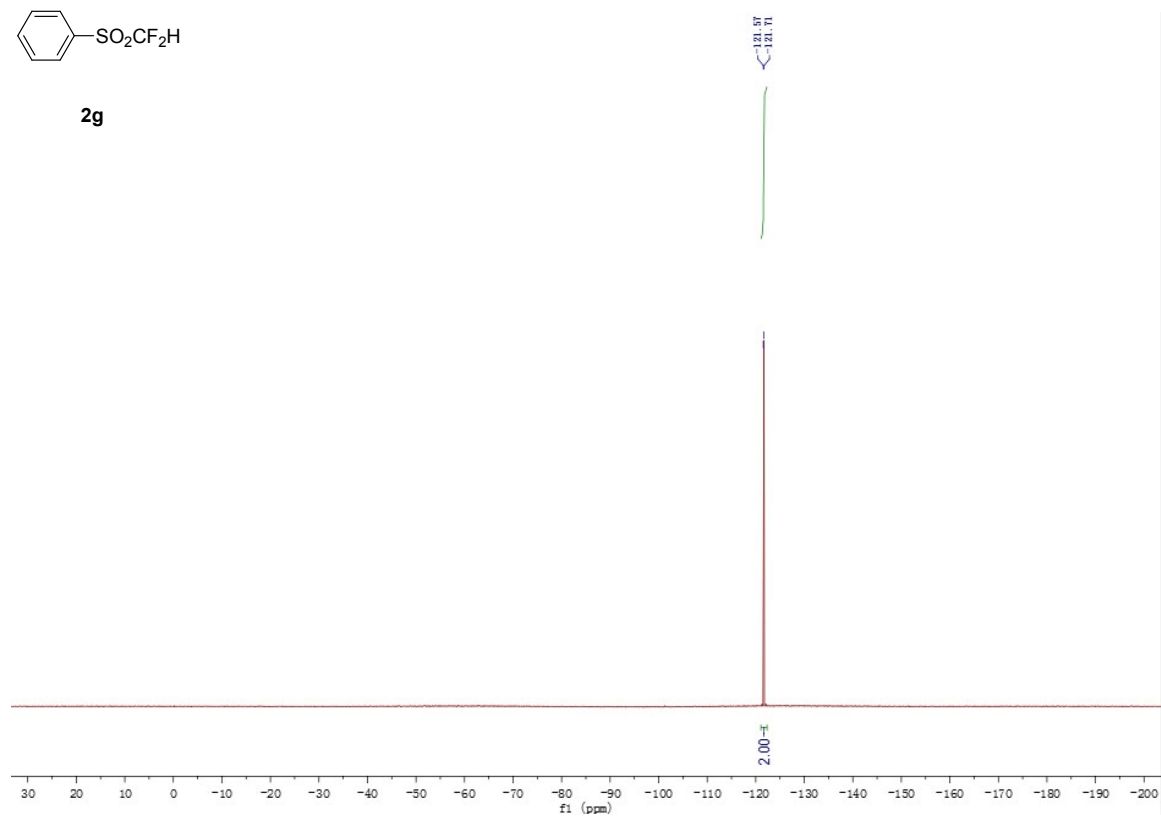

<sup>1</sup>H NMR

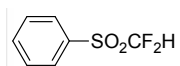

**2g**

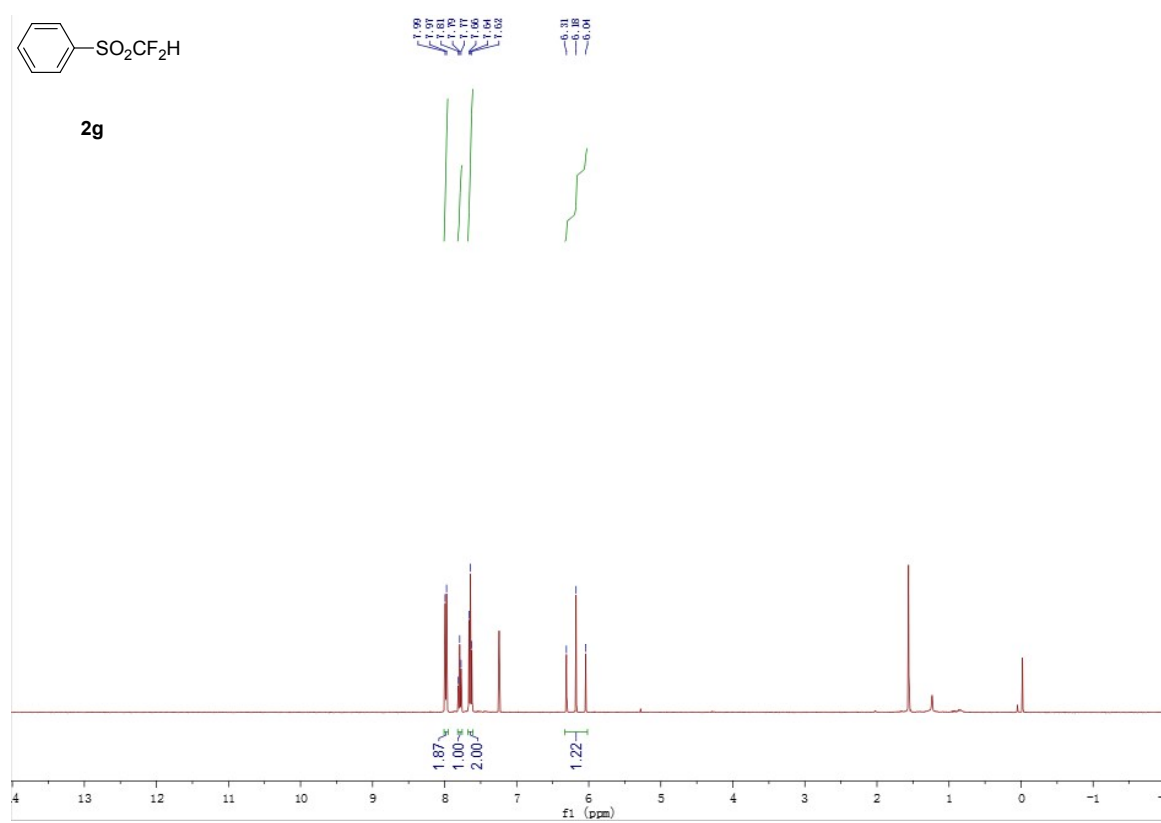

<sup>19</sup>F NMR

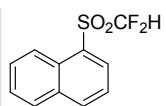

**2h**

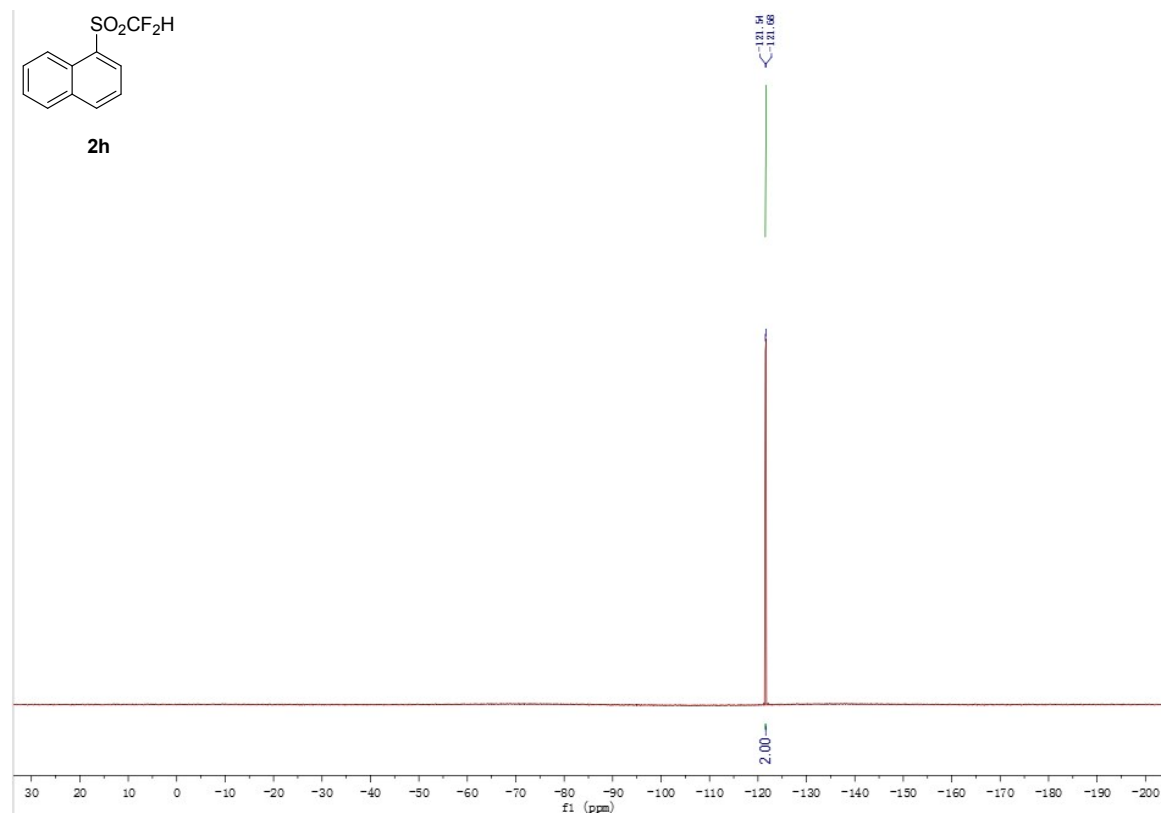



<sup>1</sup>H NMR

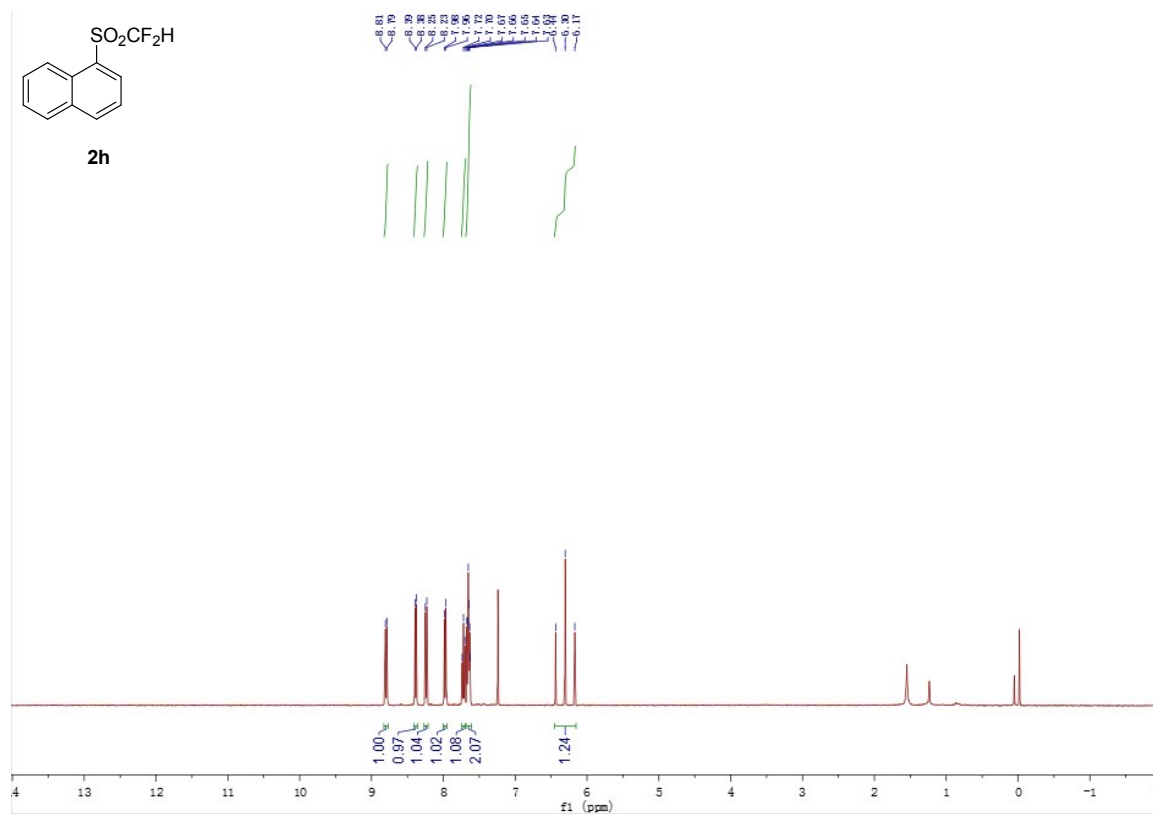

<sup>19</sup>F NMR

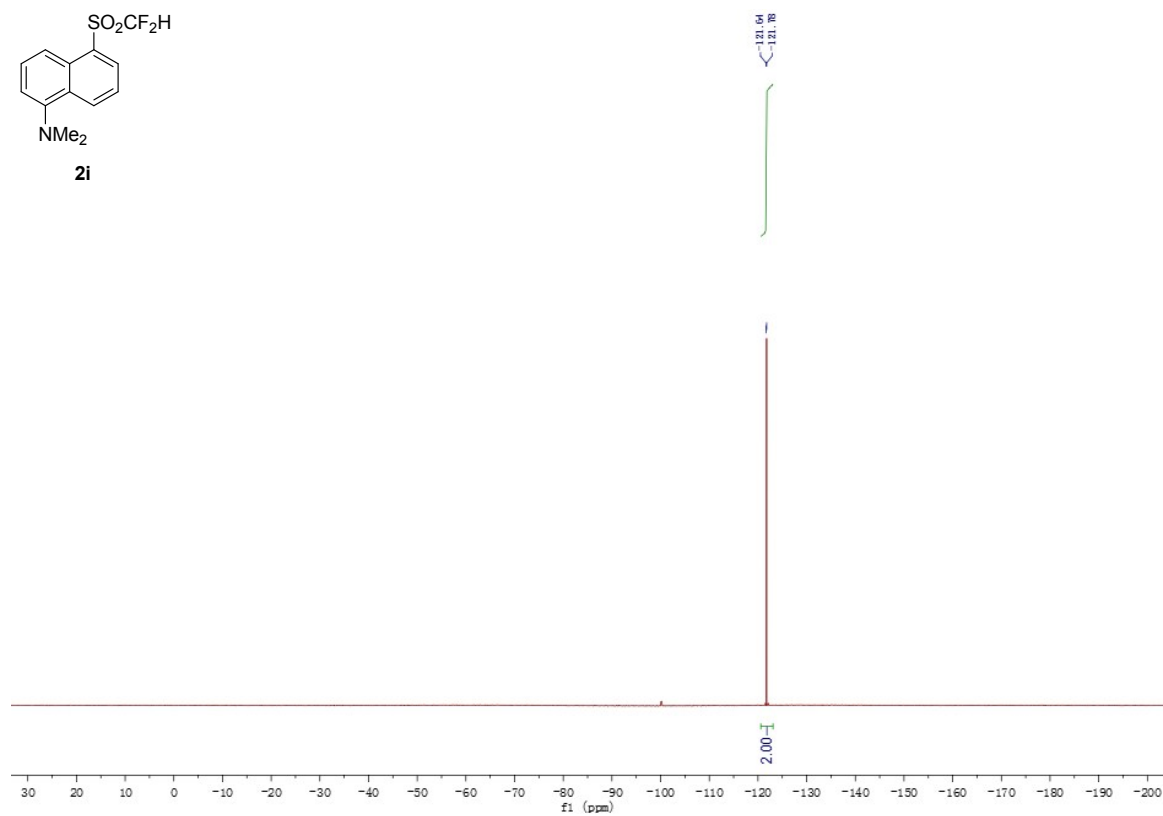

<sup>1</sup>H NMR

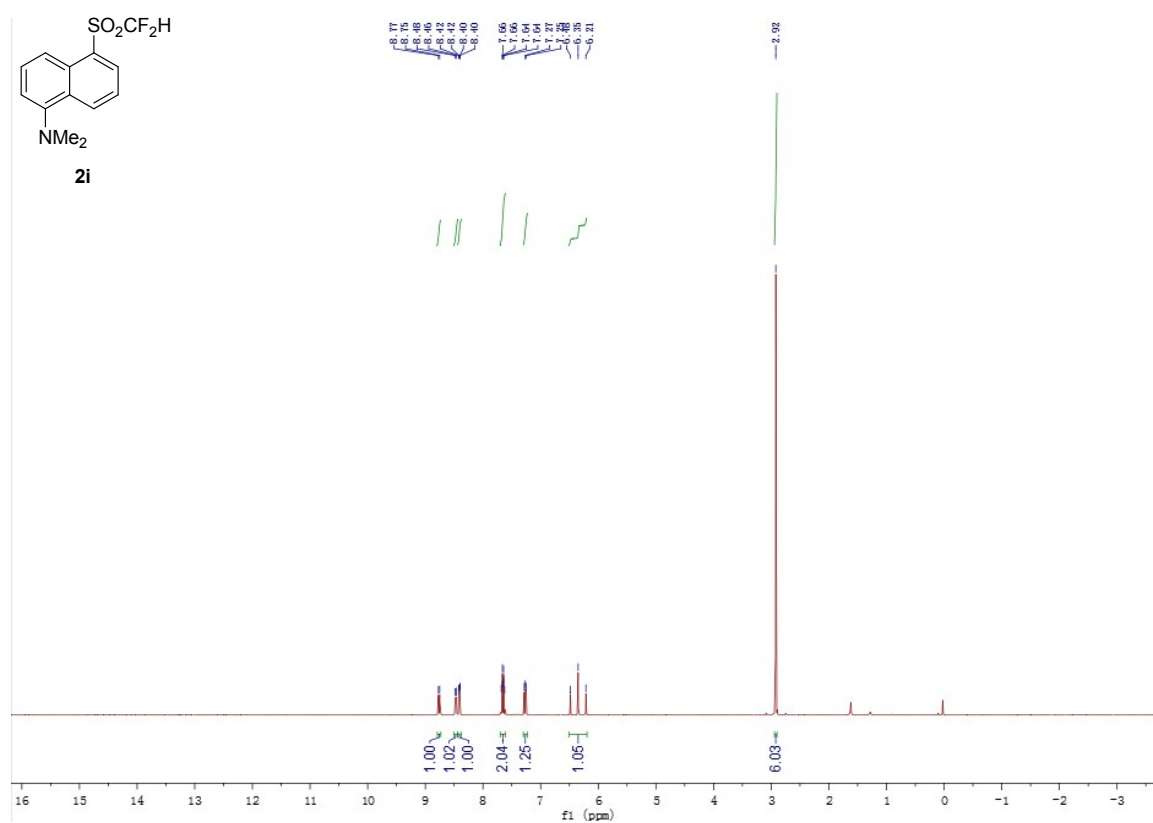

<sup>13</sup>C NMR

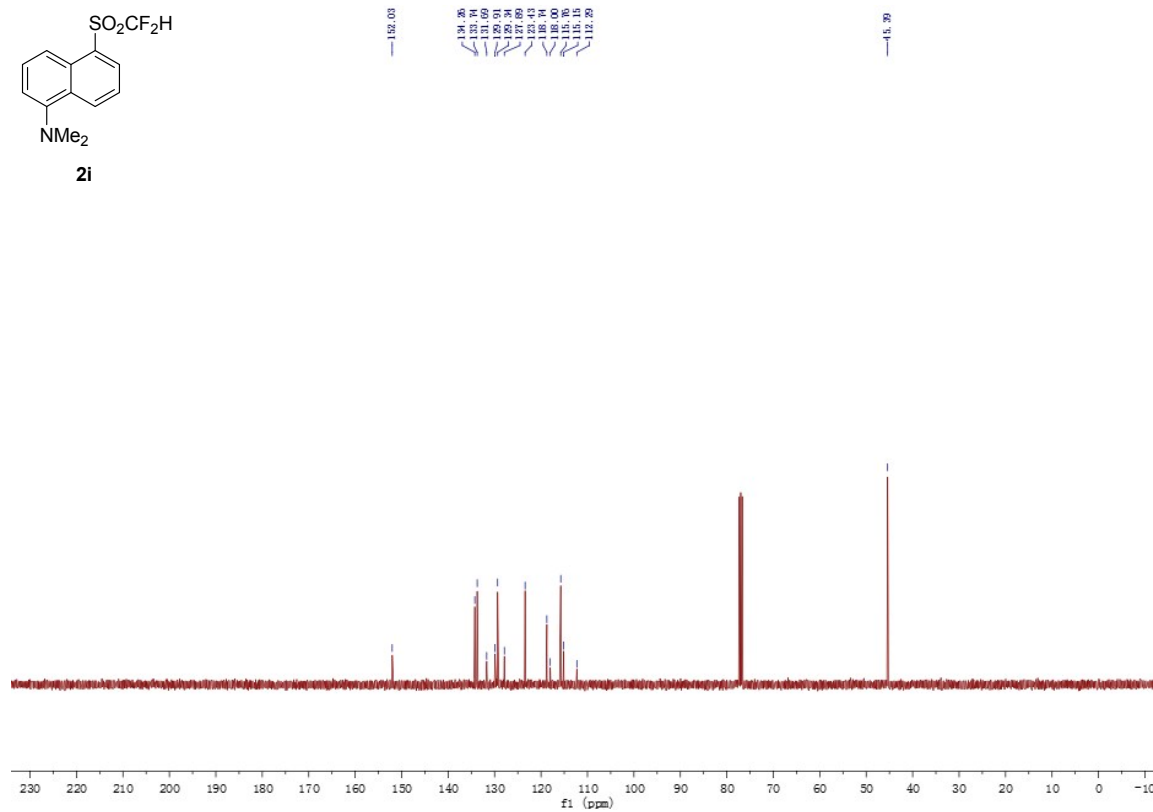

<sup>19</sup>F NMR

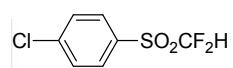

2j

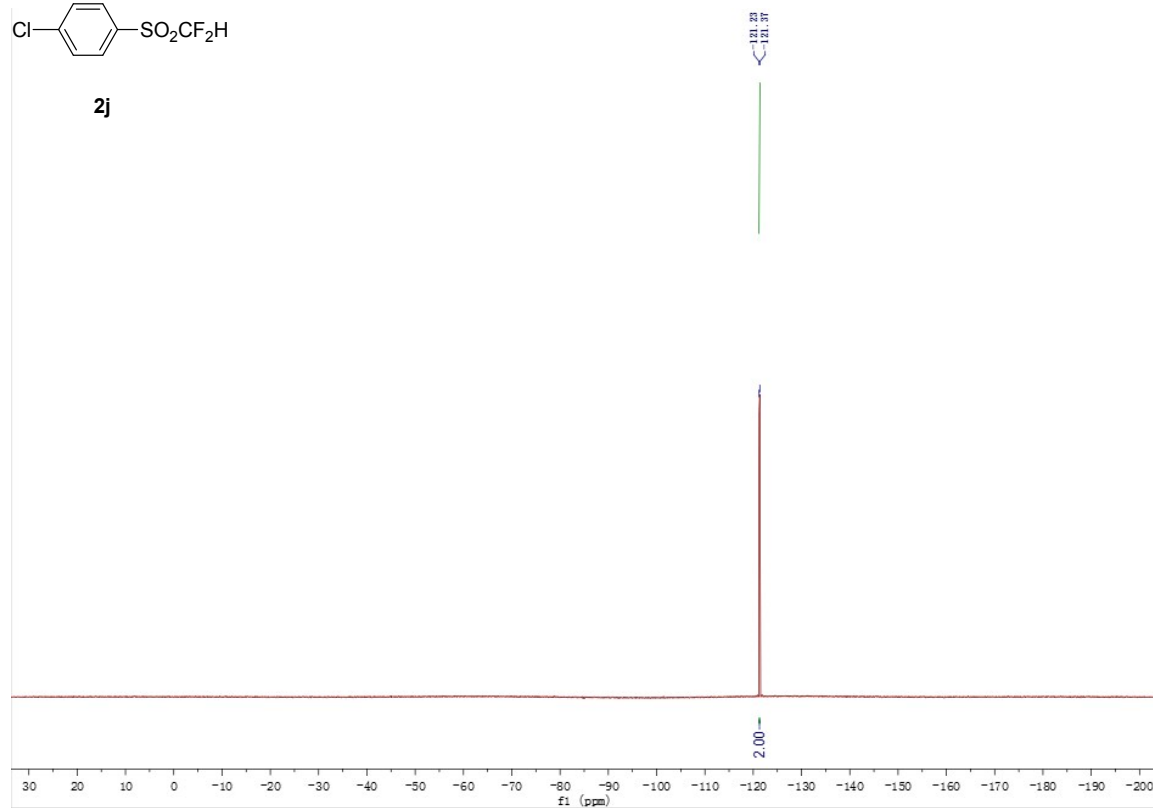

<sup>1</sup>H NMR

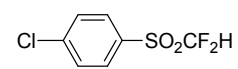

2j

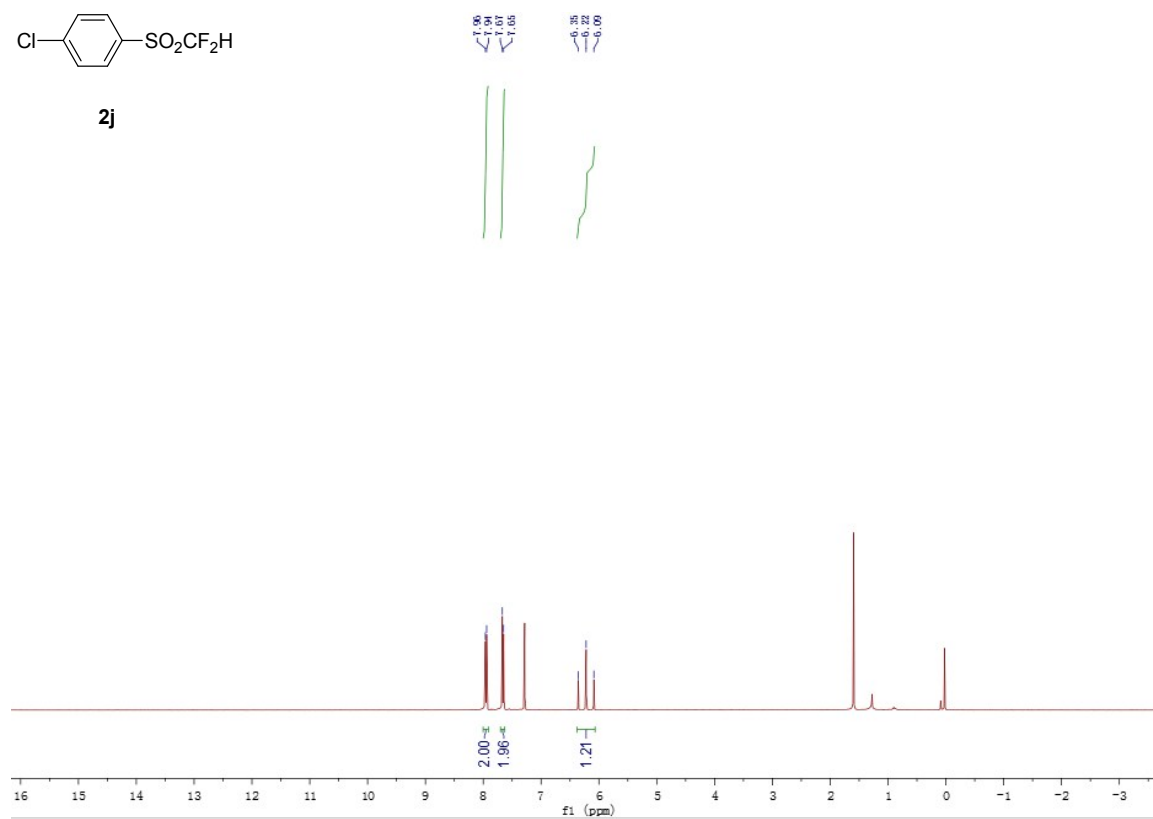

<sup>19</sup>F NMR

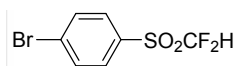

**2k**

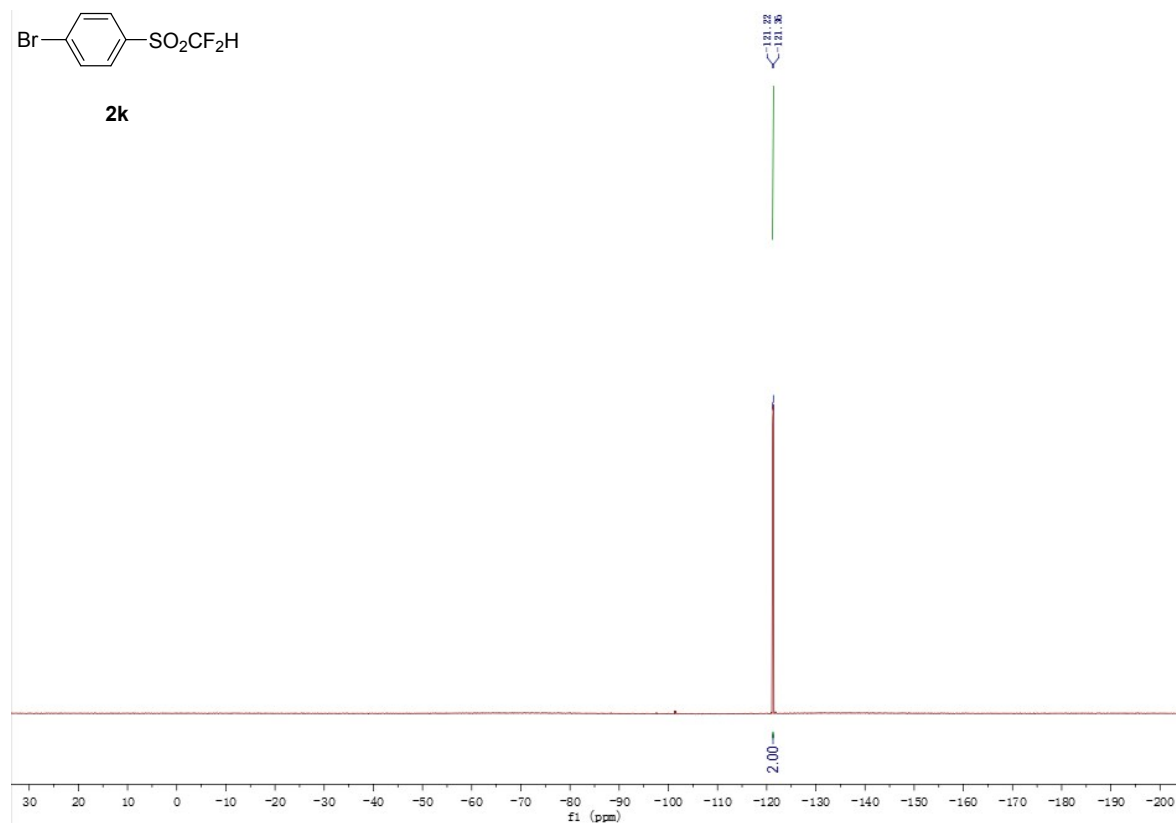

<sup>1</sup>H NMR

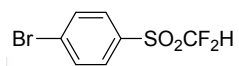

**2k**

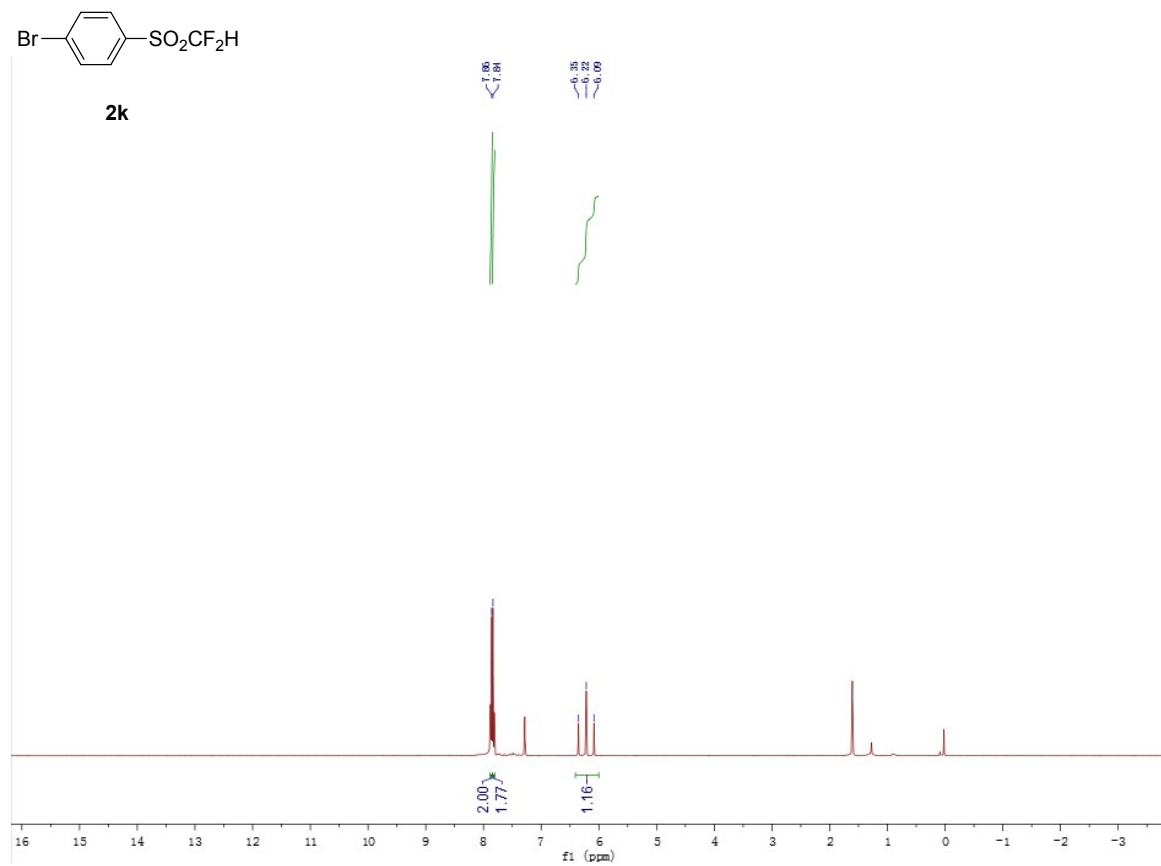

<sup>19</sup>F NMR

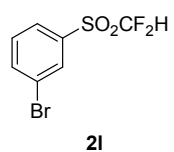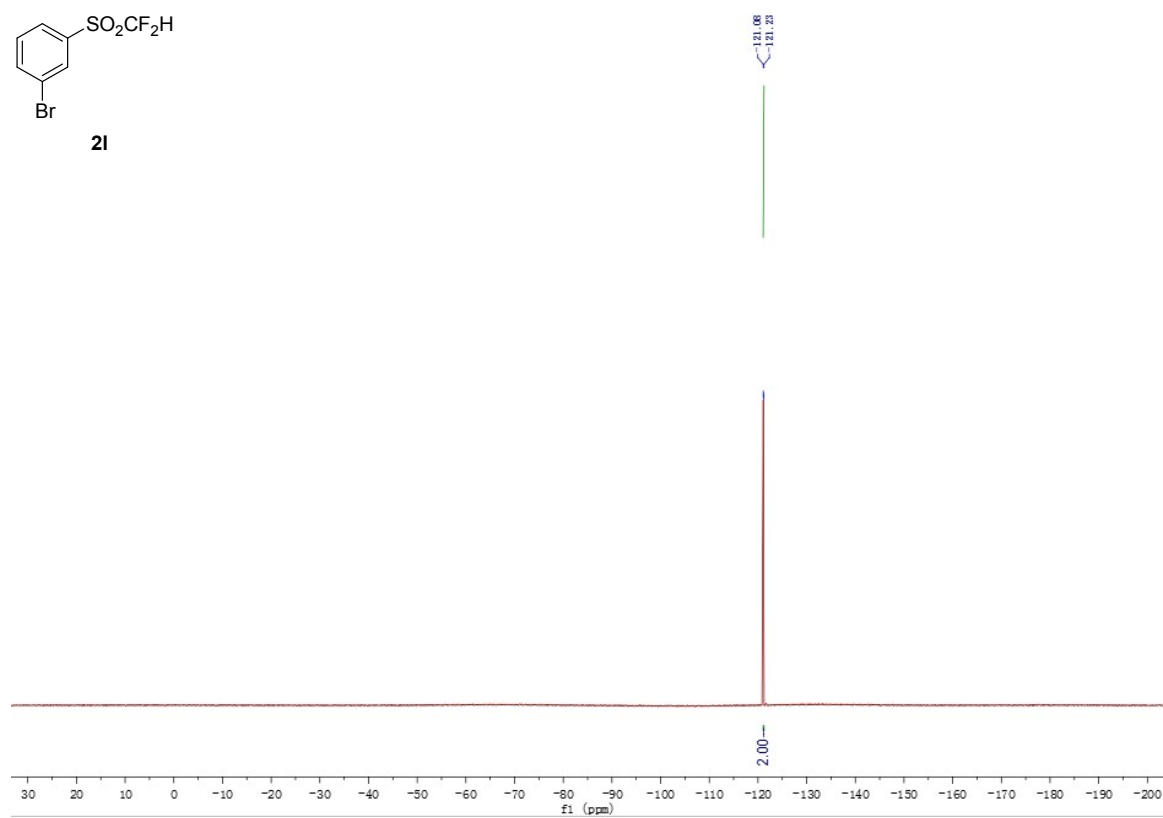

<sup>1</sup>H NMR

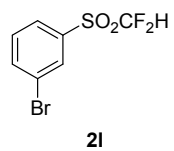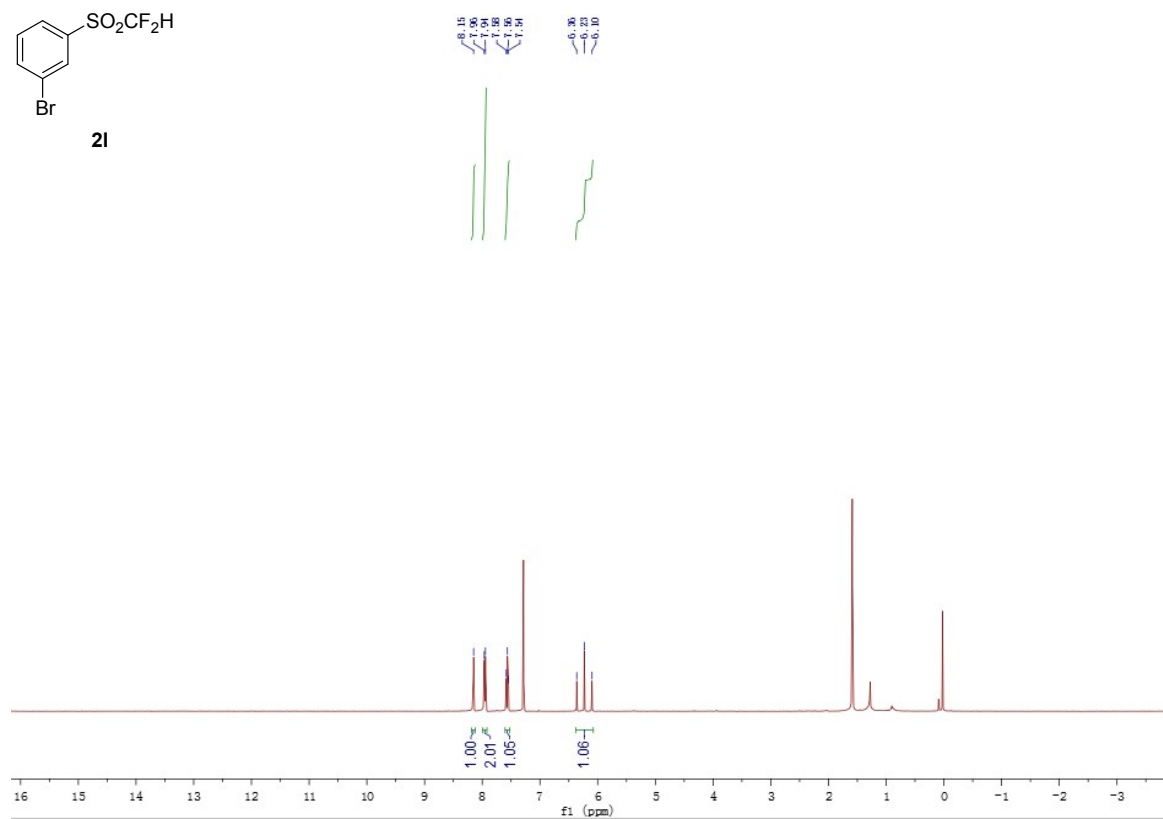

<sup>19</sup>F NMR

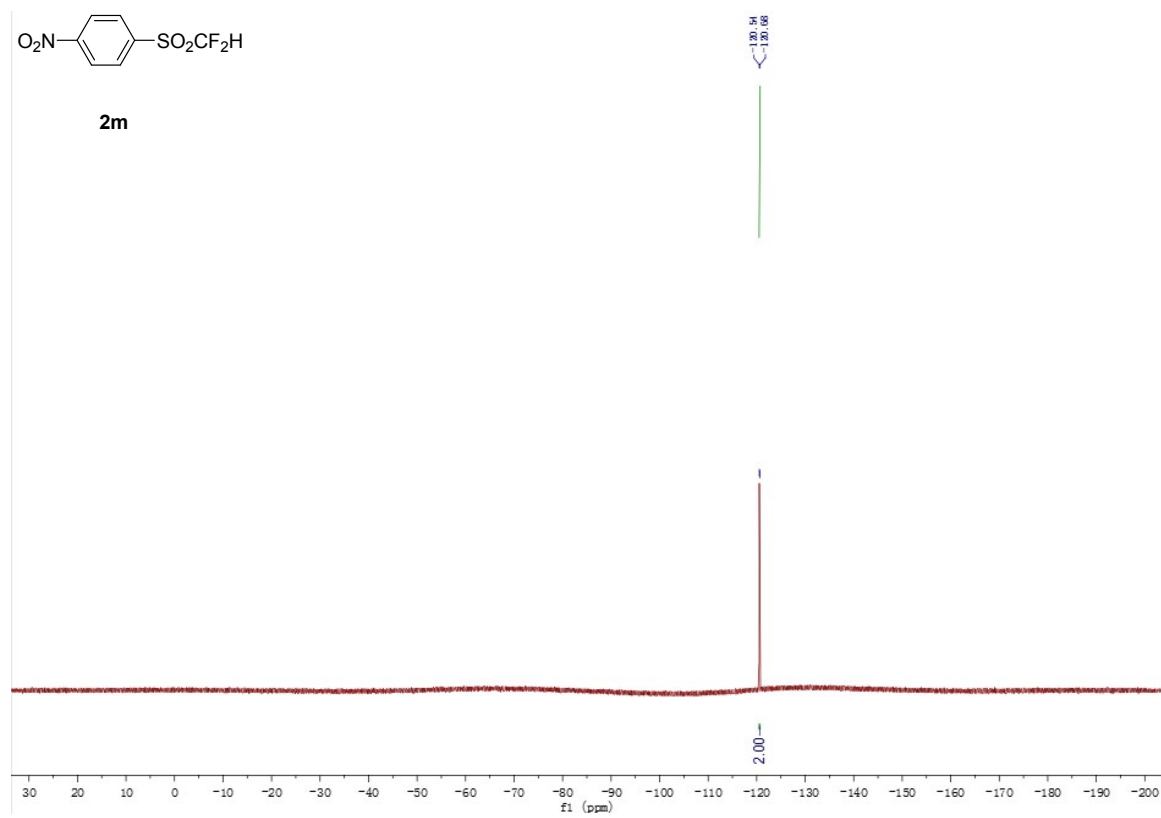

<sup>1</sup>H NMR

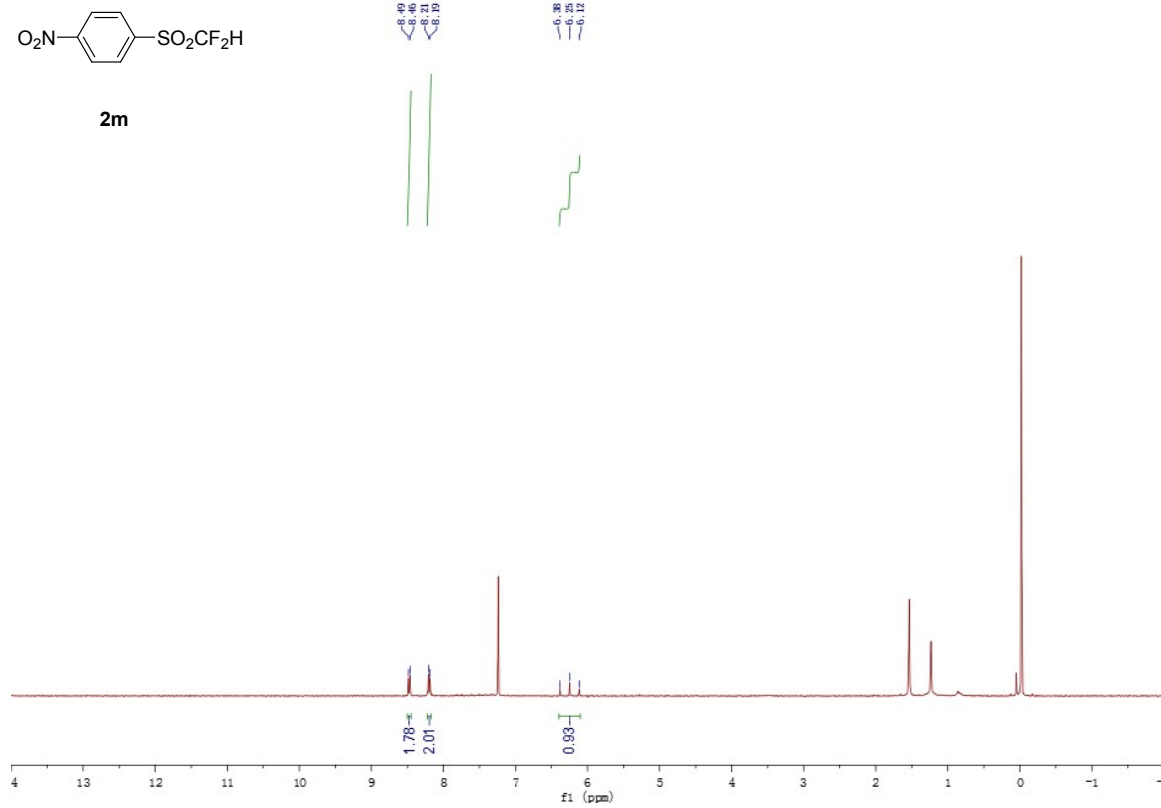

<sup>19</sup>F NMR

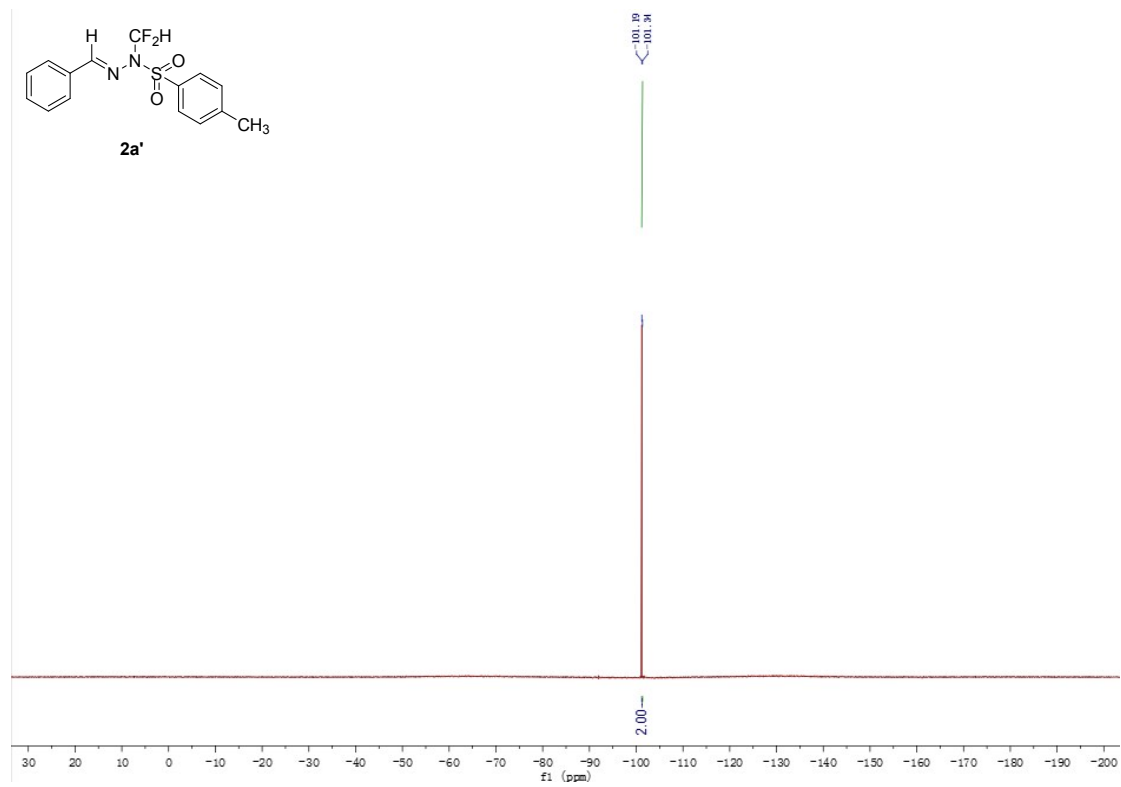

<sup>1</sup>H NMR

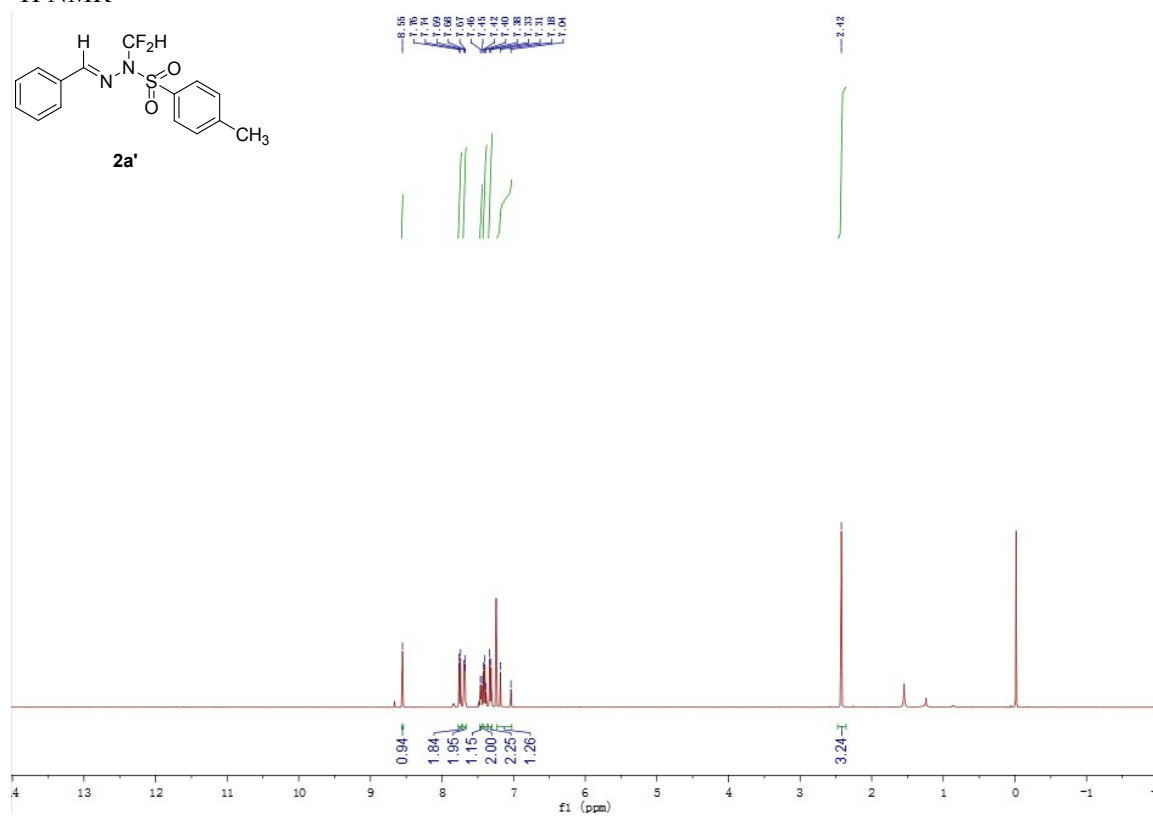

<sup>13</sup>C NMR

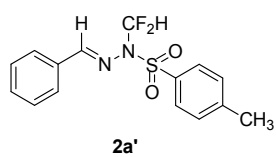

161.90  
161.89  
145.38  
133.68  
132.91  
131.91  
131.91  
128.78  
128.68  
128.50  
11.07  
11.05  
109.16

21.09

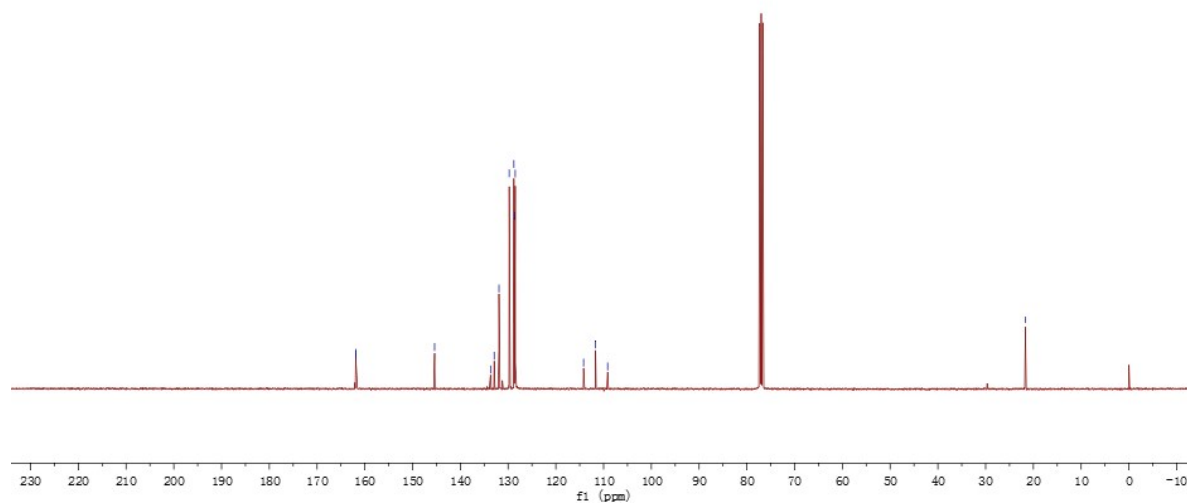

Supplement: c6ra20629h1.pdf [file c6ra20629h1.pdf]
